1 Biodiverse food plants in the semiarid region of Brazil have unknown potential: A systematic review

2 Michelle Cristine Medeiros Jacob<sup>1\*</sup>, Maria Fernanda Araujo Medeiros<sup>1</sup>, Ulysses Paulino Albuquerque<sup>2</sup>

3

4 <sup>1</sup>Nutrition Department, Universidade Federal do Rio Grande do Norte, Natal, Rio Grande do Norte,  
5 Brazil

6 <sup>2</sup> Botany Department, Universidade Federal de Pernambuco, Recife, Pernambuco, Brazil

7

8 \*Corresponding author

9 e-mail: [michellejacob@ufrn.edu.br](mailto:michellejacob@ufrn.edu.br)

10

11

12

13

14

15

16

17

## 18 **Abstract**

19 Food biodiversity presents one of the most significant opportunities to enhance food and nutrition security  
20 today. The lack of data on many plants, however, limits our understanding of their potential and the  
21 possibility of building a research agenda focused on them. Our objective with this systematic review was  
22 to identify biodiverse food plants occurring in the Caatinga biome, Brazil, strategic for the promotion of  
23 food and nutrition security. We selected studies from the following databases: Web of Science,  
24 Medline/PubMed (via the National Library of Medicine), Scopus and Embrapa Agricultural Research  
25 Databases (BDPA). Eligible were original articles, published since 2008, studying food plants occurring  
26 in the Caatinga. We assessed the methodological quality of the studies we selected. We reviewed a total  
27 of fifteen studies in which 65 plants that met our inclusion criteria were mentioned. Of this amount, 17  
28 species, including varieties, subspecies, and different parts of plants, had data on chemical composition,  
29 in addition to being mentioned as food consumed by rural communities in observational ethnobotanical  
30 studies. From the energy and protein data associated with these plants, we produced a ranking of strategic  
31 species. The plants with values higher than the average of the set were: *Dioclea grandiflora* Mart. ex  
32 Benth (mucunã), *Hymenaea courbaril* L. (jatobá), *Syagrus cearensis* Noblick (coco-católé), *Libidibia*  
33 *ferrea* (Mart. ex Tul.) L.P.Queiroz (jucá), *Sideroxylon obtusifolium* (Roem. & Schult.) T.D.Penn.  
34 (quixabeira). We suggest that the scientific community concentrates research efforts on tree legumes, due  
35 to their resilience and physiological, nutritional, and culinary qualities.

36 Keywords: Biodiversity. Food and Nutrition Security. Sustainable Diets. Sustainable Development Goals.

37

38

## 39 **Introduction**

40           The scientific community pinpoints the reform of food systems as one of the main actions to face  
41 the Global Syndemic of obesity, undernutrition, and climate change [1–4]. This reform involves  
42 promoting sustainable diets, which connect the challenges of food and nutrition security (FNS) and  
43 biodiversity conservation, expressed in objectives 2 and 15 in the United Nations 2030 agenda [5].

44           There is no doubt that the approach to sustainable diets is associated with the need to map the  
45 available food biodiversity [6]. There are a variety of publications that already present data of this nature.  
46 They are observational ethnobotanical studies, experimental research on the chemical composition of  
47 food, ethnographic analyses, which are dispersed, separated in different areas of knowledge: health,  
48 environmental, and agrarian sciences, as well as humanities, among others. With this systematic review  
49 (SR), we seek to connect these data to provide the state of available and known food biodiversity in one  
50 of the Brazilian ecosystems most threatened by degradation processes associated with climate change, the  
51 Caatinga (dry seasonal forest). Considering that disciplinary barriers limit our perception of the problem  
52 of FNS, we intend to lay the groundwork for a research agenda that includes the multiple disciplinary  
53 perspectives involved in the analysis of FNS.

54           Brazil has an estimated flora of 46,833 species, including algae, angiosperms, bryophytes, fungi,  
55 gymnosperms, ferns and lycophytes [7]. A total of 6,053 of these species occur in the Caatinga, one of the  
56 six Brazilian biomes, distributed over an area of 844,453 km<sup>2</sup>, which corresponds to almost 10% of the  
57 national territory. The Caatinga, where about 27 million people live, is a region with successive periods  
58 of drought, hot weather, and xerophytic vegetation [8]. We justify the choice of this biome as part of this  
59 review in two ways. First, the accelerated process of degradation via anthropic action highlights the  
60 urgency of finding strategies to protect its species diversity. Second, the fact that the Caatinga covers the

61 region of Brazil, the Northeast, with the second highest prevalence of severe food insecurity (hunger  
62 proxy) in the country [9], also is a rationale of our choice.

63 Evidence indicates that food biodiversity is one of the factors positively correlated with the quality  
64 of diets. In a study to evaluate the nutritional adequacy and dietary biodiversity of the diets of women and  
65 children in rural areas of Benin, Cameroon, Democratic Republic of Congo, Ecuador, Kenya, Sri Lanka,  
66 and Vietnam, Lachat *et al.* [10] observed a positive association between the species richness of food  
67 consumed and the quality of the diet, both in dry and rainy seasons. They presented relevant data for  
68 policymakers in developing countries since the global biodiversity hotspots coincide with areas of low  
69 income, poverty, and undernutrition [11]. Other references emphasize the crucial role that native plants  
70 play in supplementing essential micronutrients, providing a safety net during periods of scarcity [12].  
71 Besides, there is well-established evidence that links food diversity to the adequacy of energy,  
72 micronutrients, and child growth [13].

73 On the other hand, we must consider that an environment rich in biodiversity does not necessarily  
74 contribute to better quality diets. This is shown by the food consumption assessment study carried out in  
75 the Democratic Republic of Congo by Termote *et al.* [14]. The authors found that in this region of high  
76 biodiversity and with the population experiencing severe food insecurity, the consumption of local plants  
77 was insufficient, limiting the adequacy of diets. The authors listed the lack of information about these  
78 plants as one of the probable reasons for their low consumption. Undoubtedly, one of the challenges  
79 involved in promoting sustainable diets is the scarcity of data on availability, consumption, and nutritional  
80 composition of these kinds of plants, which we will call biodiverse food plants here [6,15]. We consider  
81 biodiverse food plants (BFP) as plants of extensive use (e.g., beans, rice, corn) and unconventional food  
82 plants (UFP), usually native, often neglected, and of culturally-limited use. For UFP, we can also consider  
83 native and heirloom varieties of conventional foods grown locally. In conventional dietary surveys, the

84 consumption of BFP is often not analyzed, which is a cause and a consequence of the absence of these  
85 species in food composition tables. It is a cause because it is unproductive to collect data that will not be  
86 adequately analyzed. It is a consequence because it is not productive to conduct food composition studies  
87 on plants that, theoretically, are not consumed. The lack of data of this nature is more significant in the  
88 case of the UFP [16].

89 Therefore, with this SR, our objective is to answer the following question: *Which food plants*  
90 *occurring in the Caatinga biome are strategic for promoting food and nutrition security?* For this, we  
91 listed and characterized food plants occurring in the Caatinga mentioned in the reviewed studies, and then  
92 we selected strategic plants to promote FNS. To date, there is no SR study on food plants in the Caatinga.

93

## 94 **Method**

95 This SR was conducted based on the PRISMA Statement, see File 1 for Checklist [17]. In  
96 compliance with the requirements of Brazilian law, we registered our research with the Genetic Heritage  
97 Management Council (SisGen, in Portuguese) under number A0AD60B. Our protocol for this review was  
98 not previously registered because our research does not analyze directly any health-related outcomes.

99

## 100 **Selection criteria**

101 The following research question guided this review: *Which food plants occurring in the Caatinga*  
102 *biome are strategic for promoting food and nutritional security?*

103 We selected articles following these eligibility criteria: (i) original articles, published in English,  
104 Spanish, or Portuguese, from 2008 to 2020, the year in which we finalized our review; (ii) papers focused  
105 on the study of food plants occurring in the Brazilian Caatinga biome.

106 We set our time frame beginning in 2008 because, in Brazil, the discussion on food biodiversity  
107 started to gain visibility from 2009, especially, under the name “*Plantas Alimentícias Não Convencionais*”  
108 (UFP, in English). A quick query in *Google Trends* with this term demonstrates the tendency that justifies  
109 our clipping. This criterion offered a proxy so that the time frame was not arbitrary.

110 We also excluded repeated articles and review products.

111

## 112 **Search sources**

113 Between October 2018 and February 2020, we used four databases to perform the search: Web of  
114 Science, Medline/PubMed (via the National Library of Medicine), Scopus, and Embrapa Agricultural  
115 Research Databases. We used the first three because of their excellent performance in collecting evidence  
116 for SR [18]. We added Embrapa's database to gather more Brazilian studies on the topic. Then, we  
117 manually checked the reference lists of the articles filtered by the descriptors.

118

## 119 **Search**

120 The research consisted of applying the descriptors in each database. Following the PRISMA  
121 guidelines, the search strategy applied to each of the databases is available in the Supporting Information,  
122 File 2, attached.

123

## 124 **Study selection**

125 With the assistance of the reference manager *Mendeley*, we organized all records and deleted  
126 duplicates. Applying the eligibility criteria previously outlined, one author (MFAM) and one collaborator  
127 (LMS) selected the articles individually. Initially, titles and abstracts underwent a first screening, at which  
128 point we excluded those that did not meet the selection criteria. In cases of discrepancies or uncertainties  
129 about inclusion, we consulted a second author (MCMJ). Then, we proceeded to a full reading of potentially  
130 eligible texts.

## 131 **Data extraction**

132 We extracted data from the selected articles into a spreadsheet designed to answer the research  
133 question. One author (MFAM) and one collaborator (LMS) were involved in the extraction. We gathered  
134 the following information: (i) article data (authors, year of publication, journal); (ii) location of the study  
135 and collection of plant material; (iii) objectives; (iv) design; (v) participants (when applicable); (vi)  
136 investigated results; (vii) methods; (viii) related results; (ix) quality; and (x) nutritional composition  
137 indicators available in the studies. One second author (MCMJ) was responsible to verify the accuracy and  
138 scope.

139 We evaluated the methodological quality of the studies with the support of the following  
140 recommendations: Analytical Quality Control (AQC) [19], Strengthening the Reporting of Observational  
141 Studies in Epidemiology Statement (STROBE) [20] and the Consolidated Criteria for Reporting  
142 Qualitative Research (COREQ) [21].

143 For the analysis of experimental food studies, we used the AQC, which consists of a checklist of  
144 21 criteria to evaluate reports of chemical analysis. As the identification of plant material is relevant to  
145 our analysis and is not in this protocol, we added the item to it. Following the method of Medeiros *et al.*  
146 [22] we gave a positive evaluation for this item when the authors identified more than 80% of the taxa at  
147 the species level, which the author and her collaborators considered as low risk. Therefore, we analyzed a  
148 total of 22 items in the case of experimental studies. In the case of ethnobotanical studies, as there are no  
149 consolidated protocols for assessing their overall quality, we chose to adopt and adapt a consolidated  
150 protocol, the STROBE, having as reference the objectives of our study. STROBE consists of a checklist  
151 of 22 essential items applied to observational epidemiological studies. Again, considering the relevance  
152 of the identification of plant material, we added the Medeiros *et al.* reference to the protocol, for a total of  
153 23 items. Finally, we used COREQ to analyze the only qualitative study in our sample. This protocol is  
154 intended for the evaluation qualitative research reports that make use of interviews. However, in the  
155 absence of a specific instrument for qualitative documentary analysis, we adopted it and evaluated the  
156 applicable criteria (18 of 32 items) for the analysis of documents.

157 After analyzing all the items, the studies received a point for each criterion fulfilled. Based on the  
158 grades received, we established three categories for quality assessment: strong - when the study met more  
159 than 80% of the criteria; moderate - from 50 to 80%; weak - less than 50%. In cases of studies with mixed  
160 methods, we proceeded as follows: we evaluated both phases, with different protocols, and calculated the



161 arithmetic mean. In order to reduce bias in the accumulated evidence, we discarded any study assessed as  
162 weak.

163

## 164 **Summary of results**

165         Considering the heterogeneous nature of the included studies, we produced narrative summaries  
166 of each of the articles eligible for a full reading.

167         To survey the plants, we proceeded as follows: initially, we scanned the BFP presented in the  
168 studies. We selected plants classified as food in the original studies and described in them at the species  
169 level. With a previous list, we checked the scientific nomenclatures using the *Taxonomic Name Resolution*  
170 *Service v 4.0* software. We updated all of them to the accepted nomenclature. We selected plants with  
171 occurrence in the Caatinga biome by consulting the *Flora do Brazil 2020* database [23]. We considered  
172 the species as native or exotic, taking as reference the “origin” field in *Flora do Brazil*. We considered the  
173 occurrence to be in the Caatinga if in the field “phytogeographic domain” there was a reference to this  
174 biome. From the articles, we collected the information to associate with the plants in our final list, such as  
175 popular names, edible parts, culinary uses, and nutritional composition indicators, when available.

176

## 177 **Other analyses**

178         For this review, we divided the category of BFP into two: *food plants* and *potentially edible plants*.  
179 In the first category, we include those plants reported as food in ethnobotanical or mixed methods studies.  
180 The second, on the other hand, includes plants mentioned as edible only in experimental studies, with no  
181 mention of their consumption by human groups in the analyzed studies. For our analysis of strategic plants,

182 we considered only the first category, that is, the set of food plants. Of these, we analyzed those that had  
183 composition data associated with them.

184 We emphasize that these two categories of plants may have antinutritional factors and toxic  
185 compounds. Our decision to consider only plants with confirmed consumption by human groups was a  
186 way of giving an objective reference that indicated a more significant potential for the edibility of the  
187 plant.

188 Using the nutritional indicators provided by the studies - energy (Kcal or KJ) and protein (g, grams)  
189 - we analyzed the species that had both higher energy and protein contributions. We obtained this analysis  
190 by adding the energy data (converted into Kcal) to the calculation of the energy coming specifically from  
191 the protein portion.

192 The diet of populations experiencing food insecurity in the area of this biome is deficient mainly  
193 in protein and also in energy [24]. For this reason, we considered energy and protein together as food  
194 markers with the potential to strengthen FNS in the region. We produced a ranking of these plants and  
195 analyzed dispersion measures. We highlighted those with values above the average of the set.

196

## 197 **Results**

### 198 **Study selection**

199 The search in the databases led to the recovery of 318 studies (122 in the Web of Science, 47 in  
200 Medline/PubMed, 131 in Scopus and 18 in Embrapa). After excluding 88 duplicates, we considered 230  
201 articles as eligible for the next stage of selection. Based on titles and abstracts, we selected 23 articles for

202 full reading. The articles excluded at this stage were mostly about plants not associated with human  
203 consumption, such as plants consumed by animals or with other categories of use, studies on  
204 unconventional animals present in human diets, studies on pollination or research on agricultural  
205 efficiency of large-scale plantations, such as of soybeans. Of the articles selected for full reading, we  
206 excluded eight publications because they did not fit the inclusion criteria. One of the articles, for example,  
207 was excluded because it was an analysis of the nutritional composition of a single plant that has no  
208 occurrence in the Caatinga biome (*Bombacopsis amazonica* A. Robyns, castanha da chapada). Thus, a  
209 total of 15 articles make up this SR. This selection work was carried out by two authors (MFAM and  
210 MCMJ) and one collaborator (LMS). Fig 1 shows the study selection process and the related flowchart.

211

## 212 **Fig 1 Flowchart of the study selection process**

213

## 214 **Study characteristics**

215 Nine of the studies we selected were ethnobotanical, eight of them were observational and cross-  
216 sectional [25–32], one was historical [33]. The size of their samples ranged from 15 to 117 people, with  
217 an average of 55 participants. The studies were set in communities in the Caatinga area in the Brazilian  
218 states of Pernambuco (PE), Paraíba (PB) and Rio Grande do Norte (RN). The historical research was based  
219 on the work *Historia Naturalis Braziliae* by Guilherme Piso and Jorge Marcgrave. Considering the scarce  
220 and dispersed historical sources of the South American continent, this book is a landmark in scientific  
221 studies that aim to make Brazilian flora known.

222 The randomized experimental studies of analysis of food composition totaled five [24,34–37].  
223 These studies presented indicators of nutritional composition (macronutrients, micronutrients, and  
224 bioactive compounds), ranging from 1 to 14 species per study, with an average of approximately five  
225 species. All plants analyzed were collected in the field by the authors of the original studies.

226 One of the studies had a mixed method: an observational phase of ethnobotanical reference (68  
227 participants), and an experimental phase resulting in an analysis of the chemical composition of seven  
228 species.

229 Table 1 provides an overview of the main characteristics of the 15 studies included in this review.

230 We grouped the results in two parts. The first includes *food plants* and *potentially edible plants*,  
231 which consist of the plants mentioned in the studies that met our inclusion criteria. Second, under the title  
232 of *strategic food plants*, we present the BFP with a nutritional profile that addresses the main dietary  
233 deficiencies in the region.

234

235 **Table 1 Characterization of studies regarding biodiverse food plants in Caatinga biome**

| <b>Stud<br/>y<br/>num<br/>ber</b> | <b>Data on<br/>publicati<br/>on<br/>(authors,<br/>year and<br/>journal)</b> | <b>Setting</b> | <b>Objective</b> | <b>Design</b> | <b>Particip<br/>ants</b> | <b>Outcomes<br/>investigat<br/>ed</b> | <b>Outcome<br/>s<br/>measure<br/>ment<br/>method</b> | <b>Outcome<br/>s</b> | <b>Quali<br/>ty</b> |
|-----------------------------------|-----------------------------------------------------------------------------|----------------|------------------|---------------|--------------------------|---------------------------------------|------------------------------------------------------|----------------------|---------------------|
|-----------------------------------|-----------------------------------------------------------------------------|----------------|------------------|---------------|--------------------------|---------------------------------------|------------------------------------------------------|----------------------|---------------------|

|   |                                                                                           |                                          |                                                                                                               |                               |     |                                                                                                                                   |                                                                             |                                                                                                                           |          |
|---|-------------------------------------------------------------------------------------------|------------------------------------------|---------------------------------------------------------------------------------------------------------------|-------------------------------|-----|-----------------------------------------------------------------------------------------------------------------------------------|-----------------------------------------------------------------------------|---------------------------------------------------------------------------------------------------------------------------|----------|
| 1 | Almeida <i>et al.</i> , 2016 (34)<br><br><i>Food chemistry</i>                            | Mossoró, RN, Brazil                      | To evaluate the bioactive compounds and the antioxidant potential of the fruit of <i>Ximenia americana</i> L. | Randomized experimental study | N/A | Bioactive compounds and antioxidant activity - flavonoids, anthocyanins, carotenoids, vitamin C                                   | Chemical composition analysis of fruits harvested directly from wild plants | Fruits are a potential source of antioxidants, with possible applications in pharmacology, medicine and nutrition         | Moderate |
| 2 | Carvalho <i>et al.</i> , 2011 (24)<br><br><i>Journal of Food Composition and Analysis</i> | Floresta Nacional do Araripe, CE, Brazil | To investigate the food potential of 14 wild legumes from the Caatinga                                        | Randomized experimental study | N/A | Energy, macronutrients, micronutrients and presence of antinutrients - lecithin, trypsin inhibitor, urease – and toxic substances | Analysis of chemical composition of ripe wild seeds collected in dry season | Seeds have nutritional relief equal to or greater than those found in conventional legumes such as beans and soybeans     | Strong   |
| 3 | Cavalcanti; Bora; Carvajal, 2009 (35)<br><br><i>Cienc. e Tec. de Alimentos</i>            | Santa Luzia, PB, Brazil                  | To characterize functional properties of the protein isolate of <i>Cnidococcus quercifolius</i> Pohl almonds  | Randomized experimental study | N/A | Macronutrients and functional properties (absorption capacity, emulsification and solubility) of the two varieties of the plant   | Analysis of chemical composition of ground almonds                          | High lipid and protein content. Potential for nutritional applications. The thornless variety showed better water and oil | Moderate |

|   |                                                                                              |                     |                                                                                                  |                                                      |                                                                   |                                                                                                                                                         |                            |                                                                                                                                            |        |
|---|----------------------------------------------------------------------------------------------|---------------------|--------------------------------------------------------------------------------------------------|------------------------------------------------------|-------------------------------------------------------------------|---------------------------------------------------------------------------------------------------------------------------------------------------------|----------------------------|--------------------------------------------------------------------------------------------------------------------------------------------|--------|
|   |                                                                                              |                     |                                                                                                  |                                                      |                                                                   |                                                                                                                                                         |                            | absorption capacity                                                                                                                        |        |
| 4 | Cruz <i>et al.</i> , 2014 (25)<br><br><i>Journal of Ethnobiology and Ethnomedicine</i>       | Altinho, PE, Brazil | To analyze participants' perceptions of native edible plants and relate to socioeconomic factors | Ethnobotanical, observational, cross-sectional study | 39 people, > 18 years old, living in one Caatinga rural community | Relationship between the perception of food plants with their use (number of items used) and socioeconomic factors (age, gender, income and occupation) | Semi-structured interviews | Flavor was the positive perception most associated with use; cultural acceptance, negative. Perceptions directly related to age and income | Strong |
| 5 | Cruz; Peroni; Albuquerque, 2013 (26)<br><br><i>Journal of Ethnobiology and Ethnomedicine</i> | Altinho, PE, Brazil | To relate knowledge, use and management of wild edible plants and socioeconomic factors          | Ethnobotanical, observational, cross-sectional study | 39 people, > 18 years old, living in one Caatinga rural community | Relationship between knowledge, use, and management (number of items known, consumed, preparations) with socioeconomic factors                          | Semi-structured interviews | Knowledge is related to age, but not to occupation and uses. Association between age and use may indicate abandonment of                   | Strong |

|   |                                                                                |                     |                                                                 |                                                                                                   |                                                                     | (age, gender, income, and occupation)                                                         |                                                         | the resource                                                                                                                                                                                  |        |
|---|--------------------------------------------------------------------------------|---------------------|-----------------------------------------------------------------|---------------------------------------------------------------------------------------------------|---------------------------------------------------------------------|-----------------------------------------------------------------------------------------------|---------------------------------------------------------|-----------------------------------------------------------------------------------------------------------------------------------------------------------------------------------------------|--------|
| 6 | Nascimento <i>et al.</i> , 2011 (36)<br><br><i>Food Research International</i> | Altinho, PE, Brazil | To determine nutritional composition of native Caatinga species | Randomized experimental study                                                                     | N/A                                                                 | Energy, macronutrients and bioactive compounds - anthocyanins, flavonoids and carotenoids     | Analysis of chemical composition of plants, ripe fruits | Plants with high nutritional potential. The study points out plants of interest for future research on bioactive compounds (e.g., <i>Sideroxylon obtusifolium</i> (Roem. & Schult.) T.D.Penn. | Strong |
| 7 | Nascimento <i>et al.</i> , 2012 (38)<br><br><i>Economic Botany</i>             | Altinho, PE, Brazil | Collect ethnobotanical and nutritional data on famine foods     | Mixed methods. Phase 1: Ethnobotanical, observational, cross-sectional study. Phase 2: Randomized | 68 people, > 18 years old, living in two Caatinga rural communities | Phase 1: Relationship between knowledge and socioeconomic factors. Phase 2: Energy, macronutr | Free list and semi-structured interview                 | There is a difference in knowledge between communities. The data demonstrate the nutritional potential                                                                                        | Strong |

|   |                                                                                                     |                            |                                                                                                                                        |                                                                        |                                                                                                |                                                                                                                                                             |                                                                                                     |                                                                                                                                                                                                                 |            |
|---|-----------------------------------------------------------------------------------------------------|----------------------------|----------------------------------------------------------------------------------------------------------------------------------------|------------------------------------------------------------------------|------------------------------------------------------------------------------------------------|-------------------------------------------------------------------------------------------------------------------------------------------------------------|-----------------------------------------------------------------------------------------------------|-----------------------------------------------------------------------------------------------------------------------------------------------------------------------------------------------------------------|------------|
|   |                                                                                                     |                            |                                                                                                                                        | experimen<br>tal study                                                 |                                                                                                | ients and<br>bioactive<br>compound<br>s from the<br>seven<br>main<br>species                                                                                |                                                                                                     | of<br>Caatinga<br>plants.<br><i>Mandevilla<br/>tenuiflora</i><br>(J.C.<br>Mikan)<br>Woodson<br>is<br>indicated<br>for future<br>studies                                                                         |            |
| 8 | Nascimen<br>to <i>et al.</i> ,<br>2013 (27)<br><br><i>Ecology<br/>of Food<br/>and<br/>Nutrition</i> | Altinho<br>, PE,<br>Brazil | To<br>compare<br>traditional<br>knowledg<br>e<br>regarding<br>food<br>plants in<br>two rural<br>communit<br>ies in the<br>Caatinga     | Ethnobot<br>anical,<br>observatio<br>nal, cross-<br>sectional<br>study | 68<br>people,><br>18 years<br>old,<br>living in<br>two<br>Caatinga<br>rural<br>communit<br>ies | Relationsh<br>ip<br>between<br>knowledg<br>e and use<br>of plants<br>with socioecon<br>omic<br>factors,<br>comparing<br>data from<br>two<br>communit<br>ies | Free list,<br>semi-<br>structure<br>d<br>interview<br>and<br>adapted<br>version<br>of 24h<br>Recall | There is a<br>difference<br>in<br>knowledg<br>e between<br>communit<br>ies.<br>Despite<br>extensive<br>knowledg<br>e, native<br>species<br>have low<br>frequency<br>of<br>consumpt<br>ion in<br>communit<br>ies | Stron<br>g |
| 9 | Santos <i>et<br/>al.</i> , 2009<br>(28)<br><br>Economic<br>Botany                                   | Altinho<br>, PE,<br>Brazil | To<br>analyze<br>the<br>contributi<br>on of<br>anthropog<br>enic<br>landscape<br>s to<br>providing<br>useful<br>botanical<br>resources | Ethnobot<br>anical,<br>observatio<br>nal, cross-<br>sectional<br>study | 15<br>people,><br>18 years<br>old,<br>living in<br>one<br>Caatinga<br>rural<br>communit<br>y   | Species<br>distributio<br>n by<br>categories<br>of use -<br>forage,<br>medicinal,<br>food and<br>timber                                                     | Semi-<br>structure<br>d<br>interview<br>s and<br>“field<br>herbariu<br>m”                           | The study<br>presents<br>119<br>species.<br>Forage<br>was the<br>main<br>category.<br>10% of<br>the plants<br>have food<br>use,<br>among<br>them                                                                | Stron<br>g |



|    |                                                                |                                        |                                                                                                               |                                                      |                                                                      |                                                                                                  |                                                                    |                                                                                                                                                                  |          |
|----|----------------------------------------------------------------|----------------------------------------|---------------------------------------------------------------------------------------------------------------|------------------------------------------------------|----------------------------------------------------------------------|--------------------------------------------------------------------------------------------------|--------------------------------------------------------------------|------------------------------------------------------------------------------------------------------------------------------------------------------------------|----------|
|    |                                                                |                                        |                                                                                                               |                                                      |                                                                      |                                                                                                  |                                                                    | <i>Senegalia bahiensis</i> (Benth.) Seigler & Ebinger                                                                                                            |          |
| 10 | Santos <i>et al.</i> , 2014 (29)<br><br><i>Economic Botany</i> | Crato, CE, Brazil; Caruaru, PE, Brazil | To investigate the usefulness of invasive native and exotic plants for residents of two different communities | Ethnobotanical, observational, cross-sectional study | 106 people, > 18 years old, living in two Caatinga rural communities | Relate species considered invasive (native and exotic) with their local perception of usefulness | Semi-structured interviews and plot method for vegetation sampling | 55 of the 56 local species considered invasive are considered useful. Participants mentioned 12% of plants as food, among them <i>Passiflora cincinnata</i> Mast | Strong   |
| 11 | Ferraz <i>et al.</i> , 2012 (30)<br><br><i>Bosque</i>          | Floresta, PE, Brazil                   | To know the types of use of woody vegetation made by indigenous family farmers                                | Ethnobotanical, observational, cross-sectional study | 30 people, > 18 years old, living in one Caatinga rural community    | Categories of use of woody species - food, fodder, fuel, construction                            | Participant observation and semi-structured interviews             | 27 species identified. Forage was the main use category. 11% of the plants are mentioned as food, among them <i>Croton</i>                                       | Moderate |

|    |                                                                                          |                       |                                                                                                                                                                                                        |                                               |     |                                                                                                                                         |                                                   |                                                                                                                                           |        |
|----|------------------------------------------------------------------------------------------|-----------------------|--------------------------------------------------------------------------------------------------------------------------------------------------------------------------------------------------------|-----------------------------------------------|-----|-----------------------------------------------------------------------------------------------------------------------------------------|---------------------------------------------------|-------------------------------------------------------------------------------------------------------------------------------------------|--------|
|    |                                                                                          |                       |                                                                                                                                                                                                        |                                               |     |                                                                                                                                         |                                                   | <i>blanchetianus</i> Baill                                                                                                                |        |
| 12 | Juvik <i>et al.</i> , 2017 (37)<br><br><i>Molecules</i>                                  | Petrolina, PE, Brazil | To identify non-polar constituents of <i>Bromelia laciniosa</i> Mart. ex Schult. & Schult.f., <i>Neoglaziovia variegata</i> (Arruda) Mez and <i>Encholirium spectabile</i> Mart.ex Schult. & Schult.f. | Randomized experimental study                 | N/A | Fatty acids and their derivatives, very long chain alkanes, vitamins ( $\alpha$ and $\beta$ -tocopherol), triterpenoids and derivatives | Analysis of chemical composition of plants        | Plants with high nutritional potential. Highlight for the presence of vitamin E and phytosterols with potential beneficial health effects | Strong |
| 13 | Medeiros; Albuquerque, 2014 (33)<br><br><i>Journal of Ethnobiology and Ethnomedicine</i> | N/A                   | To list the food plants described in <i>História Naturalis Braziliae</i> (Piso and Marcgrave, 17th century) with a focus on the Caatinga                                                               | Ethnobotanical, historical, descriptive study | N/A | Taxonomic classification, identification of plant parts, forms of consumption and verification of use over time                         | Historical document analysis and databases search | The use of 80 food species is recommended, such as <i>Spondias tuberosa</i> Arruda and <i>Cereus jamacaru</i> DC. Some lack               | Strong |

|    |                                                                                         |                                                                   |                                                                                                    |                                                      |                                                                                    |                                                                                                                     |                                           |                                                                                                                                                                          |          |
|----|-----------------------------------------------------------------------------------------|-------------------------------------------------------------------|----------------------------------------------------------------------------------------------------|------------------------------------------------------|------------------------------------------------------------------------------------|---------------------------------------------------------------------------------------------------------------------|-------------------------------------------|--------------------------------------------------------------------------------------------------------------------------------------------------------------------------|----------|
|    |                                                                                         |                                                                   |                                                                                                    |                                                      |                                                                                    |                                                                                                                     |                                           | nutritional studies                                                                                                                                                      |          |
| 14 | Nunes <i>et al.</i> , 2018 (31)<br><br><i>Journal of Ethnobiology and Ethnomedicine</i> | São Mamede, PB, Brazil; Lagoa, PB, Brazil; Itaporanga, PB, Brazil | To investigate the knowledge of food plants in three communities, comparing communities and gender | Ethnobotanical, observational, cross-sectional study | 117 indigenous farmers, > 18 years old, living in three Caatinga rural communities | Comparison of knowledge of native plants in the three communities and their relationship with socioeconomic factors | Semi-structured interviews                | 26 food species are mentioned, especially <i>Spondias tuberosa</i> Arruda. Knowledge of residents of the three communities is low                                        | Strong   |
| 15 | Roque; Loiola, 2013 (32)<br><br><i>Revista Caatinga</i>                                 | Caicó, RN, Brazil                                                 | To identify the main categories of use of native plants in a rural community in the Caatinga       | Ethnobotanical, observational, cross-sectional study | 23 local experts, > 35 years, living in one Caatinga rural community               | Categories of use of native species - medicinal, food, timber, mystical, fuel, forage, domestic use                 | Semi-structured and structured interviews | The use of 69 species has been described. Medicinal potential related to almost 90% of the plants. 11% were food, with emphasis on <i>Ziziphus joazeiro</i> Mart. and S. | Moderate |

|  |  |  |  |  |  |  |  |                     |  |
|--|--|--|--|--|--|--|--|---------------------|--|
|  |  |  |  |  |  |  |  | <i>obtusifolium</i> |  |
|--|--|--|--|--|--|--|--|---------------------|--|

236

## 237 **Quality analysis**

238 We evaluated the studies of moderate and strong quality. Characteristics of the experimental  
239 studies that contributed most to our determination of moderate quality were the omission of the reporting  
240 of limits, absence of interlaboratory proficiency tests, and lack of taxonomic identification of flora. Two  
241 of the five studies did not report having performed the botanical identification of the analyzed material  
242 [34,35]. We did not add nutritional data of these species in our analysis of strategic plants. In  
243 ethnobotanical studies, we related moderate quality with omission of study limitations, lack of  
244 generalization of the results, and absence of indication of study design. All ethnobotanical studies included  
245 botanical identification of species. None of the studies analyzed less than 85% of taxa at the species level.  
246 The qualitative study had a strong evaluation. We did not rate any study as weak.

247

## 248 **Food plants and potentially edible plants occurring in the Caatinga**

249 From the studies, we extracted 65 species (Table 2). Some of these plants, occurring in Caatinga,  
250 are native to other biomes, such as *Talisia esculenta* (Cambess.) Radlk. (pitomba), *Ilex paraguariensis* L.  
251 (erva-mate), *Genipa americana* L. (genipapo), *Inga edulis* Mart. (ingá), and *Piper marginatum* Jacq

252 (capeba). These plants may have been introduced to the region through trade, exchange, or importation  
 253 and now have their consumption incorporated by local communities. *Dimorphandra gardeneriana* Tul.,  
 254 likewise, although it occurs in the Caatinga, is not native to it. We justify its presence in our data by the  
 255 fact that its collection happened in the Araripe National Forest, located in a transition zone that presents  
 256 traces of the Atlantic Forest, Cerrado, and Caatinga.

257

258 **Table 2 Synthesis of food plants and potentially edible plants occurring in the Caatinga**

| Number        | Scientific name                                    | Popular name                | Reporting studies            | Origin | Edible part              | Culinary uses                                              |
|---------------|----------------------------------------------------|-----------------------------|------------------------------|--------|--------------------------|------------------------------------------------------------|
| ANACARDIACEAE |                                                    |                             |                              |        |                          |                                                            |
| 1             | <i>Commiphora leptophloeos</i> (Mart.) J.B.Gillett | umburana                    | et (#14)                     | native | fruit                    | raw (spice)                                                |
| 2             | <i>Spondias tuberosa</i> Arruda                    | umbu;<br>umbuzeiro;<br>imbu | et (#4 #5 #8 #9 #11 #13 #14) | native | fruit;<br>tuber;<br>leaf | raw (juice); cooked ( <i>umbuzada</i> );<br>preserve (jam) |
| APOCYNACEAE   |                                                    |                             |                              |        |                          |                                                            |
| 3             | <i>Mandevilla tenuifolia</i> (J.C. Mikan) Woodson  | manofê                      | et (#4 #5 #8); mx (#7)       | native | tuber                    | raw (salad; juice);<br>preserve (pickles)                  |
| AQUIFOLIACEAE |                                                    |                             |                              |        |                          |                                                            |
| 4             | <i>Ilex paraguariensis</i> L.                      | erva-mate                   | et (#8)                      | native | leaf                     | na                                                         |

ARECACEAE

|   |                                                  |                                        |                           |        |       |     |
|---|--------------------------------------------------|----------------------------------------|---------------------------|--------|-------|-----|
| 5 | <i>Copernicia prunifera</i><br>(Mill.) H.E.Moore | carnaúba                               | et (#14 #15)              | native | fruit | raw |
| 6 | <i>Syagrus cearensis</i><br>Noblick              | coco-católé;<br>catolé; coco-<br>babão | et (#4 #5<br>#8); fc (#6) | native | fruit | na  |
| 7 | <i>Syagrus coronata</i><br>(Mart.) Becc.         | licuri; licurizeiro                    | et (#13)                  | native | seed  | na  |
| 8 | <i>Syagrus oleracea</i><br>(Mart.) Becc.         | coco-católé                            | et (#14)                  | native | fruit | raw |

BORAGINACEAE

|   |                                          |              |         |        |       |    |
|---|------------------------------------------|--------------|---------|--------|-------|----|
| 9 | <i>Varronia globosa</i><br>(Jacq.) Kunth | moleque-duro | et (#8) | native | fruit | na |
|---|------------------------------------------|--------------|---------|--------|-------|----|

BROMELIACEAE

|    |                                                                         |                                                             |                                  |        |             |                                                                |
|----|-------------------------------------------------------------------------|-------------------------------------------------------------|----------------------------------|--------|-------------|----------------------------------------------------------------|
| 10 | <i>Bromelia laciniosa</i><br>Mart. ex Schult. &<br>Schult.f.            | macambira;<br>macambira-<br>roxa;<br>macambira-de-<br>porco | et (#8); fc<br>(#12)             | native | leaf        | cooked<br>(flour/bread)                                        |
| 11 | <i>Encholirium</i><br><i>spectabile</i> Mart. ex<br>Schult. & Schult.f. | macambira-de-<br>flexa;<br>macambira-de-<br>pedra           | mx (#7); et<br>(#8); fc<br>(#12) | native | leaf        | cooked<br>(flour/couscous <sup>ii</sup> )                      |
| 12 | <i>Neoglaziovia</i><br><i>variegata</i> (Arruda)<br>Mez                 | caroá                                                       | fc (#12)                         | native | leaf; fruit | leaf: cooked<br>(flour/couscous <sup>ii</sup> );<br>fruit: cru |

CACTACEAE

|    |                                                                                 |                               |                                      |        |                   |                                                     |
|----|---------------------------------------------------------------------------------|-------------------------------|--------------------------------------|--------|-------------------|-----------------------------------------------------|
| 13 | <i>Cereus jamacaru</i> DC.                                                      | mandacaru;<br>cardeiro; babão | et (#4 #5 #8<br>#13 #15); fc<br>(#6) | native | cladode;<br>fruit | cladode: cooked;<br>fruit: raw; cooked;<br>preserve |
| 14 | <i>Melocactus zehntneri</i><br>(Britton & Rose)<br>Luetzelb.                    | coroa-de-frade                | et (#8)                              | native | fruit             | na                                                  |
| 15 | <i>Pilosocereus<br/>gounellei</i><br>(F.A.C.Weber) Byles<br>& Rowley            | xique-xique                   | fc (#6); mx<br>(#7); et (#8<br>#15)  | native | cladode;<br>fruit | cooked<br>(flour/couscous <sup>®</sup> );<br>baked  |
| 16 | <i>Pilosocereus<br/>pachycladus</i> subsp.<br>pernambucoensis<br>(Ritter) Zappi | facheiro                      | et (#4 #5<br>#8); fc (#6)            | native | cladode;<br>fruit | raw; preserve<br>(candy)                            |
| 17 | <i>Tacinga inamoena</i><br>(K.Schum.)<br>N.P.Taylor & Stuppy                    | cumbeba                       | fc (#6); et<br>(#8)                  | native | cladode;<br>fruit | raw; preserve (jam)                                 |

CAESALPINIACEAE

|    |                                              |        |         |        |            |    |
|----|----------------------------------------------|--------|---------|--------|------------|----|
| 18 | <i>Bauhinia cheilantha</i><br>(Bong.) Steud. | mororó | et (#8) | native | leaf; seed | na |
|----|----------------------------------------------|--------|---------|--------|------------|----|

CAPPARACEAE

|    |                                     |               |                          |        |       |     |
|----|-------------------------------------|---------------|--------------------------|--------|-------|-----|
| 19 | <i>Capparis flexuosa</i><br>(L.) L. | feijão-de-boi | et (#8)                  | native | seed  | na  |
| 20 | <i>Crataeva tapia</i> L.            | trapiá        | et (#4 #5 #8<br>#13 #14) | native | fruit | raw |

|    |                                                             |      |               |        |       |    |
|----|-------------------------------------------------------------|------|---------------|--------|-------|----|
| 21 | <i>Neocalyptrocalyx longifolium</i> (Mart.) Cornejo & Iltis | incó | et (#4 #5 #8) | native | fruit | na |
|----|-------------------------------------------------------------|------|---------------|--------|-------|----|

CELASTRACEAE

|    |                                         |          |         |        |       |    |
|----|-----------------------------------------|----------|---------|--------|-------|----|
| 22 | <i>Monteverdia rigida</i> (Mart.) Biral | bom-nome | et (#8) | native | fruit | na |
|----|-----------------------------------------|----------|---------|--------|-------|----|

EUPHORBIACEAE

|    |                                      |                          |                       |        |                           |                                    |
|----|--------------------------------------|--------------------------|-----------------------|--------|---------------------------|------------------------------------|
| 23 | <i>Cnidoscolus quercifolius</i> Pohl | favela-branca; faveleira | fc (#3); et (#11 #14) | native | seed                      | cooked (flour)                     |
| 24 | <i>Cnidoscolus urens</i> (L.) Arthur | urtiga; cansanção        | et (#8)               | native | seed                      | na                                 |
| 25 | <i>Croton blanchetianus</i> Baill    | marmeleiro               | et (#11)              | native | na                        | na                                 |
| 26 | <i>Manihot dichotoma</i> Ule.        | maniçoba                 | mx (#7); et (#8)      | native | raw                       | cooked (flour/beiju <sup>m</sup> ) |
| 27 | <i>Manihot glaziovii</i> Müll.Arg.   | purnunça; maniçoba       | mx (#7); et (#8 #13)  | native | raw                       | cooked (flour/beiju <sup>m</sup> ) |
| 28 | <i>Ricinus communis</i> L.           | mamona; azeite           | et (#10)              | exotic | leaf; flower; fruit; seed | na                                 |

FABACEAE



|     |                                                                  |                                           |                    |        |                  |                                           |
|-----|------------------------------------------------------------------|-------------------------------------------|--------------------|--------|------------------|-------------------------------------------|
| raw | <i>Amburana cearensis</i><br>(Allemão) A.C.Sm.                   | cumaru                                    | et (#14)           | native | fruit            | raw                                       |
| 30  | <i>Cajanus cajan</i> (L.)<br>Huth.                               | feijão-guandu;<br>feijão-andu             | et (#13)           | exotic | seed             | cooked                                    |
| 31  | <i>Dimorphandra</i><br><i>gardneriana</i> Tul.                   | fava-d'anta                               | fc (#2)            | native | seed             | na                                        |
| 32  | <i>Dioclea grandiflora</i><br>Mart. ex Benth                     | mucunã                                    | mx (#7)            | native | seed             | cooked<br>(flour/couscous <sup>21</sup> ) |
| 33  | <i>Dioclea megacarpa</i><br>Rolfe                                | mucunã; olho-<br>de-boi                   | fc (#2)            | native | seed             | na                                        |
| 34  | <i>Enterolobium</i><br><i>contortisiliquum</i><br>(Vell.) Morong | orelha-de-<br>macaco; orelha-<br>de-negro | fc (#2)            | native | seed             | na                                        |
| 35  | <i>Erythrina velutina</i><br>Willd.                              | mulungu                                   | fc (#2)            | native | seed             | cooked                                    |
| 36  | <i>Hymenaea courbaril</i><br>L.                                  | jatobá                                    | #2 #4 #5 #8<br>#14 | native | fruit            | raw (flour)                               |
| 37  | <i>Inga edulis</i> Mart.                                         | ingá                                      | et (#8)            | native | fruit            | na                                        |
| 38  | <i>Lablab purpureus</i><br>(L.) Sweet                            | feijão-cabricuço;<br>mandatia             | #13                | exotic | fruit;<br>flower | cooked; raw                               |
| 39  | <i>Libidibia ferrea</i><br>(Mart. ex Tul.)<br>L.P.Queiroz        | jucá; pau-ferro                           | #14 #2             | native | seed             | cooked (flour)                            |
| 40  | <i>Lonchocarpus</i><br><i>sericeus</i> (Poir.) Kunth<br>ex DC.   | ingá                                      | fc (#2)            | native | seed             | na                                        |

|    |                                                       |                               |         |        |       |    |
|----|-------------------------------------------------------|-------------------------------|---------|--------|-------|----|
| 41 | <i>Parkia platycephala</i> Benth.                     | visgueiro                     | fc (#2) | native | seed  | na |
| 42 | <i>Phaseolus lunatus</i> L.                           | fava                          | et (#8) | exotic | seed  | na |
| 43 | <i>Piptadenia moniliformis</i> Benth.                 | catanduva                     | fc (#2) | native | seed  | na |
| 44 | <i>Pterogyne nitens</i> Tul.                          | madeira-nova                  | fc (#2) | native | seed  | na |
| 45 | <i>Senegalia bahiensis</i> (Benth.) Seigler & Ebinger | espinheiro                    | et (#8) | native | fruit | na |
| 46 | <i>Senna obtusifolia</i> (L.) H.S.Irwin & Barneby     | mata-pasto                    | fc (#2) | native | seed  | na |
| 47 | <i>Senna occidentalis</i> (L.) Link                   | manjiroba                     | #9      | native | na    | na |
| 48 | <i>Senna rugosa</i> (G.Don) H.S.Irwin & Barneby       | lagarteiro                    | fc (#2) | native | seed  | na |
| 49 | <i>Caesalpinia bracteosa</i> Tul.                     | catingueira; catinga-de-porco | fc (#2) | native | seed  | na |

#### MYRTACEAE

|    |                                                  |                         |                        |        |       |    |
|----|--------------------------------------------------|-------------------------|------------------------|--------|-------|----|
| 50 | <i>Myrciaria cauliflora</i> (C. Martius) O. Berg | jabuticaba              | et (#8)                | native | fruit | na |
| 51 | <i>Psidium schenckianum</i> Kiaersk.             | pirim; araçá-do-cerrado | et (#4 #5 #8); fc (#6) | native | fruit | na |

OLACACEAE

|    |                             |                                  |                   |        |       |             |
|----|-----------------------------|----------------------------------|-------------------|--------|-------|-------------|
| 52 | <i>Ximenia americana</i> L. | ameixa-do-mato; ameixa-silvestre | fc (#1); et (#14) | native | fruit | raw (juice) |
|----|-----------------------------|----------------------------------|-------------------|--------|-------|-------------|

PASSIFLORACEAE

|    |                                    |                                                             |                    |        |                           |     |
|----|------------------------------------|-------------------------------------------------------------|--------------------|--------|---------------------------|-----|
| 53 | <i>Passiflora cincinnata</i> Mast. | maracujá-do-mato; maracujá-brabo; maracujá-de-boi; murucujá | et (#8 #10 #13)    | native | fruit; flower; leaf; seed | na  |
| 54 | <i>Passiflora foetida</i> L.       | maracujá-de-estralo; canapú; maracujá; maracujá-do-mato     | et (#8 #9 #14 #15) | native | fruit                     | raw |

PIPERACEAE

|    |                               |        |          |        |       |             |
|----|-------------------------------|--------|----------|--------|-------|-------------|
| 55 | <i>Piper marginatum</i> Jacq. | capeba | et (#13) | native | fruit | raw (spice) |
|----|-------------------------------|--------|----------|--------|-------|-------------|

PORTULACACEAE

|    |                              |                                |              |        |                     |        |
|----|------------------------------|--------------------------------|--------------|--------|---------------------|--------|
| 56 | <i>Portulaca oleracea</i> L. | beldroega; bredoégua; caaponga | et (#10 #13) | exotic | leaf; stalk; flower | cooked |
|----|------------------------------|--------------------------------|--------------|--------|---------------------|--------|

RHAMNACEAE

|    |                                   |               |                                |        |       |     |
|----|-----------------------------------|---------------|--------------------------------|--------|-------|-----|
| 57 | <i>Ziziphus joazeiro</i><br>Mart. | juá; juazeiro | fc (#6); et<br>(#8 #14<br>#15) | native | fruit | raw |
|----|-----------------------------------|---------------|--------------------------------|--------|-------|-----|

RUBIACEAE

|    |                            |                                    |          |        |       |                           |
|----|----------------------------|------------------------------------|----------|--------|-------|---------------------------|
| 58 | <i>Genipa americana</i> L. | genipapo;<br>ianupaba;<br>ienipapo | et (#13) | native | fruit | raw; preserve<br>(liquor) |
|----|----------------------------|------------------------------------|----------|--------|-------|---------------------------|

SAPINDACEAE

|    |                                               |               |             |        |       |    |
|----|-----------------------------------------------|---------------|-------------|--------|-------|----|
| 59 | <i>Talisia esculenta</i><br>(Cambess.) Radlk. | pitomba; nhua | et (#8 #13) | native | fruit | na |
|----|-----------------------------------------------|---------------|-------------|--------|-------|----|

SAPOTACEAE

|    |                                                                          |                        |                                |        |       |     |
|----|--------------------------------------------------------------------------|------------------------|--------------------------------|--------|-------|-----|
| 60 | <i>Sideroxylon</i><br><i>obtusifolium</i> (Roem.<br>& Schult.) T.D.Penn. | quixabeira;<br>quixaba | fc (#6); et<br>(#8 #14<br>#15) | native | fruit | raw |
|----|--------------------------------------------------------------------------|------------------------|--------------------------------|--------|-------|-----|

SOLANACEAE

|    |                                    |                                  |             |        |             |    |
|----|------------------------------------|----------------------------------|-------------|--------|-------------|----|
| 61 | <i>Physalis angulata</i> L.        | canapú                           | et (#15)    | exotic | na          | na |
| 62 | <i>Solanum agrarium</i><br>Sendtn. | gogóia;<br>melancia-da-<br>praia | et (#9 #15) | native | na          | na |
| 63 | <i>Solanum americanum</i><br>Mill. | erva-moura;<br>maria-pretinha    | et (#10)    | native | leaf; fruit | na |

|    |                                        |                                               |          |        |      |    |
|----|----------------------------------------|-----------------------------------------------|----------|--------|------|----|
| 64 | <i>Solanum<br/>rytidoandrum</i> Sendtn | jurubeba;<br>jurubeba-de-<br>espinho; espinho | et (#10) | exotic | leaf | na |
|----|----------------------------------------|-----------------------------------------------|----------|--------|------|----|

#### VERBENACEAE

|    |                          |           |             |        |                                  |    |
|----|--------------------------|-----------|-------------|--------|----------------------------------|----|
| 65 | <i>Lantana camara</i> L. | chumbinho | et (#9 #10) | native | stalk;<br>flower;<br>leaf; fruit | na |
|----|--------------------------|-----------|-------------|--------|----------------------------------|----|

259 Legend: #: revised study number (see Table 1); na: not available; et: ethnobotanical study; fc: food  
260 composition study; mx: mixed method study. † Typical drink from the Northeast region, prepared with  
261 the fruit of the cooked *umbu*, mixed with milk, and sugar. ‡ Sweet or salty dish prepared with steamed  
262 vegetable flour. ‣ Cooked pasta dish prepared from vegetable flour of the genus *Manihot*.

263

264 Native plants corresponded to approximately 89% of the total ( $n = 58$ ). The species belong to 22  
265 families, the most frequent being Fabaceae, Euphorbiaceae, Cactaceae, and Arecaceae. The plants most  
266 present in the studies were the following: *S. tuberosa* (*umbu*), *C. jamaçaru* (*mandacaru*), *C. tapia* (*trapiá*),  
267 *H. courbaril* (*jatobá*), and *S. cearensis* (*coco-católé*), being mentioned by seven, six, five, five, and four  
268 of the articles, respectively.

269

## 270 **Strategic food plants to promote food and nutrition security in the** 271 **Caatinga**

272 Of the studies analyzed, six presented data on food composition. In total, they provided analysis  
273 of 35 edible items, including varieties, subspecies, and different parts of plants. Only 17 of these items  
274 had their consumption also reported in observational ethnobotanical studies. These data correspond to 15

275 species of food plants since *P. gounellei* (xique-xique) and *P. pachycladus* sub. Pernambucoensis  
 276 (facheiro) had both cladodes and fruits analyzed and consumed.

277 The indicators consisted mostly of energy data, macronutrients (protein, fat, carbohydrate), dietary  
 278 fiber, micronutrients (vitamin C, vitamin E, potassium, sodium, calcium, magnesium, iron, zinc,  
 279 manganese, copper, chromium, molybdenum), and bioactive compounds (carotenoids, flavonoids,  
 280 anthocyanins). We compiled data for the items that had energy and protein indicators available in the  
 281 studies we reviewed. The complete list of these plants is available in Table 3.

282 **Table 3 Nutritional data of strategic food plants to promote food and nutrition security in the**  
 283 **Caatinga**

| <b>Food plant</b>                                           | <b>Part analyzed</b> | <b>Energy (Kcal)</b> | <b>Protein (g)</b> | <b>Protein energy (Kcal)</b> | <b>Protein energy + energia (Kcal)</b> | <b>Data source</b> |
|-------------------------------------------------------------|----------------------|----------------------|--------------------|------------------------------|----------------------------------------|--------------------|
| <i>Dioclea grandiflora</i> Mart. ex Benth                   | seed                 | 367                  | 30,90              | 124                          | 491                                    | #7                 |
| <i>Hymenaea courbaril</i> L.                                | fruit                | 431                  | 10,9               | 44                           | 475                                    | #2                 |
| <i>Syagrus cearensis</i> Noblick                            | endosperm            | 394                  | 8,95               | 36                           | 430                                    | #6                 |
| <i>Libidibia ferrea</i> (Mart. ex Tul.) L.P.Queiroz         | seed                 | 239                  | 42,7               | 171                          | 410                                    | #2                 |
| <i>Sideroxylon obtusifolium</i> (Roem. & Schult.) T.D.Penn. | fruit                | 212                  | 2,86               | 11                           | 223                                    | #6                 |
| <i>Psidium schenckianum</i> Kiaersk.                        | fruit                | 125                  | 1,64               | 7                            | 132                                    | #6                 |

|                                                                       |         |     |      |    |     |    |
|-----------------------------------------------------------------------|---------|-----|------|----|-----|----|
| <i>Encholirium spectabile</i> Mart. ex Schult. & Schult.f.            | leaf    | 125 | 0,70 | 3  | 127 | #7 |
| <i>Pilosocereus gounellei</i> (F.A.C.Weber) Byles & Rowley            | fruit   | 102 | 2,65 | 11 | 113 | #6 |
| <i>Ziziphus joazeiro</i> Mart.                                        | fruit   | 96  | 2,19 | 9  | 105 | #6 |
| <i>Manihot dichotoma</i> Ule.                                         | root    | 104 | 0,10 | 0  | 104 | #7 |
| <i>Manihot glaziovii</i> Müll.Arg.                                    | root    | 80  | 1,01 | 4  | 84  | #7 |
| <i>Tacinga inamoena</i> (K.Schum.) N.P.Taylor & Stuppy                | fruit   | 72  | 0,97 | 4  | 76  | #6 |
| <i>Pilosocereus pachycladus</i> (Ritter) Zappi subsp. pernambucoensis | fruit   | 67  | 2,10 | 8  | 76  | #6 |
| <i>Cereus jamacaru</i> DC.                                            | fruit   | 64  | 1,80 | 7  | 71  | #6 |
| <i>Mandevilla tenuifolia</i> (J.C. Mikan) Woodson                     | root    | 63  | 0,70 | 3  | 66  | #7 |
| <i>Pilosocereus gounellei</i> (F.A.C.Weber) Byles & Rowley            | cladode | 28  | 0,40 | 2  | 30  | #6 |
| <i>Pilosocereus pachycladus</i> (Ritter) Zappi subsp. pernambucoensis | cladode | 25  | 0,25 | 1  | 26  | #6 |

284 Legend: #: revised study number (see Table 1). Reference Daily Intake – 2000 kcal and 50g of protein  
 285 (39)

286

287 All species are native. Of this group of plants, *D. grandiflora*, *H. courbaril*, *S. cearensis*, *L. ferrea*,  
288 and *S. obtusifolium* have higher energy and protein values than the group average (Fig 2).

289

290 **Fig. 2 Strategic biodiverse food plants to promote food and nutrition security**

291

292 Three of these five species that lead the ranking are Fabaceae. Based on their nutritional content,  
293 we highlight the value of legumes, within the set of strategic plants, as species that can significantly  
294 contribute to improving the pattern of diets in the region. The plants that lead the ranking are in Fig 3.

295

296 **Fig. 3 Top five food plants of strategic species ranking**

297 Legend reads clockwise from upper left: Flower, leaves, and seeds of *D. grandiflora*, by Michelle Jacob.  
298 Pods of *L. ferrea* by Natalia Araújo. Fruit of *S. obtusifolium* by Gildásio Oliveira. Nut of *S. cearensis* by  
299 Michelle Jacob. *H. courbaril* by Neide Rigo.

300

301 In energy terms, the most significant contribution is from *H. courbaril* with 431 Kcal for every  
302 100 g of seeds. In protein, *L. ferrea* is ranked first, with approximately 43% protein in its seeds. In total  
303 energy and protein, top ranked is *D. grandiflora*.

304 *D. grandiflora* is cited by Teixeira *et al.* [38] in her research on famine foods, that is, plants used  
305 as food in times of scarcity. In her study, six people mentioned the use of the seeds of this species in  
306 periods of extreme drought to produce flour, prepared as couscous. The consumption of 100 g of *mucunã*  
307 seeds provides approximately 62% and 18% of the daily protein and energy requirements, respectively  
308 [24].



309           Teixeira *et al.* [27], Cruz *et al.* [25,26] and Nunes *et al.* [31] reported the consumption of *H.*  
310 *courbaril*, in rural communities in the semiarid regions of Pernambuco and Paraíba. The authors  
311 mentioned the use of fresh fruit, especially in the form of flour. The intake of 100 g of this fruit contributes  
312 to about 22% of the daily requirements for both protein and energy [24].

313           *L. ferrea* is also reported by Nunes *et al.* [31], who described the use of seeds in the form of flour  
314 in rural communities in the semiarid region of Paraíba. For every 100 g of seeds, the protein supply is 42.7  
315 g, which corresponds to more than 85% of the daily recommendation. In energy, the contribution is around  
316 12% [24]. These data highlight the potential nutritional value of plants in this biome.

317           The other two species in our ranking are *S. cearensis* and *S. obtusifolium*. Cruz *et al.* [25,26] and  
318 Nascimento *et al.* [27,36] reported *S. cearensis* consumption in rural communities of Caatinga in the state  
319 of Pernambuco. The edible part is the fruit, without specification of culinary use. Analysis of its  
320 endosperm reveals a contribution of 394 kcal for every 100 g of material analyzed, which corresponds to  
321 almost 20% of the daily energy recommendation.

322           Several ethnobotanical studies in the semiarid region of Pernambuco, Paraíba, and Rio Grande do  
323 Norte [27,31,32,36] report the consumption of fresh fruit of *S. obtusifolium*. Its energy, 212 kcal per 100  
324 g, or approximately 11% of the daily recommendation, positions it as a potential species to integrate into  
325 FNS programs in the region [36].

326           Although our analysis focuses on energy and protein, several plants on our list are significant  
327 sources of antioxidants, such as *S. obtusifolium* analyzed by Teixeira *et al.* [40]. The same author and her  
328 colleagues in a later study [38] analyzed the flavonoid content of *D. grandiflora* and found significant  
329 quercetin values. These studies also highlight the content of bioactive compounds from fruits of Cactacea  
330 species, such as *P. pachycladus* subsp. pernambucoensis (facheiro), *T. inamoena* (cumbeba), and *P.*  
331 *gounellei* (xique-xique).

332

## 333 **Discussion**

334           The main objective of this SR was to identify plants occurring in the Caatinga that could be  
335 strategic in the promotion of FNS. For this, we listed and characterized the species occurring in the biome  
336 and produced a list of strategic plants with nutritional data. Based on our analysis, we highlighted the energy  
337 and protein potential of native legumes.

338           We believe that the species richness surveyed in this review ( $n = 65$ ) underestimates the potential of  
339 BFP in the Caatinga. A search of the *Flora do Brazil* database in February 2020, for a listing of  
340 Angiosperms occurring in this environment, returns 4,890 species. Consider the fact, for example, that of  
341 the eight ethnobotanical studies that we analyzed, five of them were performed in the same community  
342 (Carão, Altinho, PE). Our data possibly underestimate the state of food biodiversity in the biome, because,  
343 in addition to having the same community as a source of information, they do not include information on  
344 BFP from the provinces of Maranhão, Piauí, Sergipe, and northern Minas Gerais, which are also areas of  
345 Caatinga. These geographic gaps strongly suggest the need for more ethnobotanical studies in the region.

346           The fact that most species are native indicates they could be positively related to sustainable diets.  
347 We have at least five arguments to sustain this thesis. First, from the environmental point of view, the  
348 native species listed as strategic are recognized for their ability to cope with drought, requiring few water  
349 resources. The consumption of Euphorbiaceae roots, for example, is typical in scenarios of water scarcity,  
350 since these plants can remain intact in the soil for a long time, even in periods of drought [41].  
351 Ecophysiology studies done with palm trees (Arecaceae) also describe species tolerant to water stress  
352 [42,43]. Similarly, Fabaceae have several strategies for adapting to drought, including shortening the  
353 growth period, maintaining high tissue water potential, reducing water loss, and improving water uptake

354 [44]. About Fabaceae, we realized that the three legumes leading our ranking are arboreal. Dubeux Júnior  
355 *et al.* [45] state that in the current climate change condition, tree legumes are an essential component for  
356 strengthening FNS. One of the authors' arguments is the resilience of these species, which tend to be more  
357 perennial than most herbaceous legumes. This characteristic is relevant in areas of the Caatinga,  
358 recognized by their long periods of rain scarcity.

359         Consequently, our second argument is that positive economic effects, such as saving water inputs,  
360 tend to enhance the local supply of food to local communities, to facilitate the opening of local-based  
361 markets, and to increase economic resilience in family farmers [46].

362         Third, nutritionally, low-diversity diets are a challenge to public health at a global level. As a  
363 matter of availability, native plants have the potential to increase the diversity of food in local communities  
364 [10]. Besides, encouraging conscious diets including native plants also is supported by an environmental  
365 argument: It is a path to make BFP known and, thus, increase possibilities for their conservation [47].

366         Fourth, there is a cultural reason. Native plants are part of the cultural heritage of local populations.  
367 Preserving them means safeguarding the traditional knowledge associated with these plants and,  
368 consequently, cultural diversity [48].

369         Finally, we add the fifth argument, which is political: food sovereignty. To food sovereignty,  
370 native plants have both cultural and genetic heritage roles. Safeguarding native species, knowledge  
371 associated with them, and biological property is part of the process of people taking control of their food  
372 heritage [49].

373         We do not disregard, however, that the introduction of exotic species may have a rational basis, as  
374 proposed by Albuquerque *et al.* [50] with the diversification hypothesis. This hypothesis posits that local  
375 systems can introduce exotic plants to expand the repertoire of communities. In the case of food, for

376 example, naturalized exotic species, in the absence of native species, can be rationally included to expand  
377 the diversity of diets and, consequently, their quality.

378 The Fabaceae, among the plants we analyzed, are especially good for their nutritional quality. We  
379 add two points to the discussion on food legumes and nutrition: antinutritional factors and protein quality.

380 First, presence of antinutritional factors (such as glucosinolates, trypsin inhibitors, hemagglutinins,  
381 tannins, phytates, and gossypol) is one of the biggest limitations on the use of legumes by humans [51,52].  
382 In the analysis by Carvalho *et al.* [24] antinutritional and toxic factors detected in legumes are not a  
383 problem for humans if the seeds are correctly processed. They also argue that similar factors are present  
384 in popular legumes (e.g., beans and soybeans) before the application of heat treatment. However, we argue  
385 that there are other phytochemicals with high toxicity not tested by the authors (e.g., alkaloids, cyanogenic  
386 glycosides) that should be considered. For example, *D. grandiflora* is one of the plants that appear in  
387 Carvalho's study as potentially safe after processing. However, local communities [50] claim that the  
388 consumption of this species can cause intestinal problems, or even death, due to its toxicity. According to  
389 residents, in addition to heat treatment, one of the ways to mitigate, and even eliminate these effects, is  
390 washing the flour several times before using it in food processing [38]. Grant *et al.* [53] affirm that the  
391 exhaustive dialysis procedure of *mucunã*'s seed flour helps to eliminate soluble components of small  
392 molecular weight potentially related to its toxicity. These data show the relevance of new studies to list  
393 compounds related to toxicity, as well as studies to gather processing techniques used in local food systems  
394 (e.g., bleaching, cooking, washing, fermentation, and dehydration, among others) to inactivate or reduce  
395 species' toxicity [54–56]. We do not recommend the consumption of *D. grandiflora* and *L. ferrea* until  
396 new research provides additional evidence.

397 A second point, which concerns protein quality: plant-based proteins have a lower anabolic  
398 potential than those animal-based [57]. Two strategies can be useful to ensure the intake of essential amino

399 acids in plant-based diets: increase the intake of proteins and improve the quality of those present in the  
400 diet [58]. The Acceptable Macronutrient Distribution Range (AMDR) suggests that protein intake should  
401 provide between 10% and 35% of the daily dietary calorie recommendation. Thus, a plant-based diet  
402 should be more aligned with the upper limit of this recommendation, that is, 35%. To improve the quality  
403 of the ingested proteins, one of the possibilities is to expand the diversity of plant proteins, blending  
404 species with different limiting amino acids [58]. Diets that include a variety of vegetable protein sources  
405 consistently demonstrate nutritional adequacy when it comes to providing sufficient amounts of essential  
406 amino acids [54, 55]. Because of these characteristics, the Food and Agriculture Organization  
407 recommends that legumes should be consumed daily as part of a healthy diet, which simultaneously  
408 prevents undernutrition, obesity, and non-communicable diseases [61].

409 In addition to nutritional quality and the ability to adapt to water scarcity, we added three other  
410 advantages that serve to consolidate the potential of legumes in the Caatinga region.

411 First, legumes' potential to fix nitrogen in the soil enriches it without the need for commercial  
412 chemical fertilizers and, consequently, offers economic and environmental advantages for sustainable  
413 agriculture [62]. Second, legumes are related to smaller land footprints when compared to vegetable  
414 proteins and, besides, they do not reduce their nutritional potential when stored for long periods. Thus,  
415 they can simultaneously reduce indicators of food loss and food waste [63]. Finally, the third reason is  
416 that legumes allow for various culinary applications, ranging from stews and flours to dumplings, as is the  
417 case of *acarajé* (fried dumpling made with beans, *Vigna unguiculata* (L. Walp., common in Bahia, Brazil),  
418 and desserts, like *paçoca* (Brazilian candy made with peanuts, *Arachis hypogaea* L., common in the  
419 Southeast region).

420 The other two species in our ranking are *S. cearensis* and *S. obtusifolium*, which in addition to their  
421 energy content, contribute with other nutrients. *S. cearensis* shows, for example, its fat profile of 69.33 g

422 or approximately 107% of the daily intake recommendation [39, 40]. Also, the species, being a typical  
423 palm that grows in semiarid regions, is a strategic source of provitamin A for rural communities in the  
424 Caatinga [64]. Each 100 g of the endosperm contains 456 mcg of REA, which corresponds to  
425 approximately 91% of the daily needs established for women and 73% for men [65]. Besides, the content  
426 of bioactive compounds of *S. obtusifolium* corresponds to almost 12 times the amount of beta-carotene in  
427 *acerola* (*Malpighia glabra* L.), 83% of quercetin present in the same portion of red onions (*Allium cepa*  
428 L.), and ten times the anthocyanins content found in *jabuticaba* (*Myrciaria cauliflora* (Mart.) O. Ber) [66–  
429 68]. These data reinforce the potential of native Brazilian flora as a source of nutrients and bioactive  
430 compounds.

431         However, studies report a decrease in consumption and knowledge associated with these plants  
432 [25–27,38]. We list here some reasons to explain this phenomenon. First, an increase in temperature and  
433 a decrease in precipitation in the Caatinga is associated with the rise of income transfer by government  
434 programs that, in turn, boosts the popularity of acquiring processed food in supermarkets, leading to a  
435 decrease in the availability of food produced from local plants [27, 69]. Second, the dynamics of  
436 globalized agri-food systems tend to uniformity: monocultures, concentration of supply and distribution  
437 centers, and monotonous dietary patterns [70]. Thus, the closer these communities are to urban centers,  
438 the higher their permeability to this process of standardization [71]. Third, there is a stigma related to these  
439 plants as "poor people's food" [25,38]. Cruz *et al.* [25], in her study of the perception about native plants  
440 in Pernambuco, associated the consumption of these species with low social status. Thus, there is a stigma  
441 related to their use. Other studies report the same stigma [38,72,73]. Together, these factors collaborate to  
442 increase the presence of processed and ultra-processed food products in people's diets, with negative  
443 impacts on their nutritional status [1,74]. These arguments indicate the role of intersectoral FNS policies,  
444 which involve not only income transfer, but access to food and nutrition education programs and policies

445 to promote family farming and local markets. The FNS implied by resilience and food sovereignty of local  
446 food systems is a matter of intersectoral policies.

447 We started the paper, considering, above all, nutritional aspects of the plants listed in the studies  
448 we analyzed. Thus, our ranking was created based on biological criteria. Human diets, however, are  
449 complex and also involve cultural factors. Diets are located between nature and culture, as the  
450 anthropologist Claude Lévi-Strauss asserted [75]. Considering this fact, we suggest that campaigns to  
451 promote the use of BFP cannot be based only on the plant's nutrient profiles. They should also consider if  
452 the plants are recognized and appreciated by local culture. In this sense, we highlight *H. courbaril* and *S.*  
453 *cearensis* as crucial plants, as they are simultaneously in the ranking of strategic plants and among the  
454 most cited in studies.

455 Finally, we add that the promotion of these plants, in the context of food systems, also depends on  
456 broader actions. Some of them are to integrate food biodiversity in government policies and programs, to  
457 provide agricultural incentives to family farmers, to register traditional knowledge, to promote sustainable  
458 use of species with consumers, and to foster multidisciplinary research [76].

459

## 460 **Limitations**

461 First, the number of plants we examined was reduced by including only species with composition  
462 data available in the studies we reviewed. To analyze the others, we could have performed Food Matching,  
463 a strategy to match composition data available in tables and other databases. However, we made the  
464 decision not to perform it and focus our analysis on plants with data available in the review, considering  
465 that the nutritional composition varies depending on environmental and cultural factors (*terroir*, climate,  
466 soil) [77]. The authors who analyzed the plants in the original studies collected them in the Caatinga,

467 which allows us to recognize their real contribution to local communities in nutritional terms. Another  
468 limitation was the lack of specific protocols for assessing the overall quality of observational  
469 ethnobotanical studies and qualitative studies focusing on documentary analysis. To address this  
470 limitation, we used consolidated protocols, and adapted them. Finally, the third limitation is the fact that  
471 we set cutoff points in the quality assessment, due to the lack of consensus in the literature on the issue.  
472 In order to minimize biases, we analyzed review studies in relevant databases to adopt approximate  
473 assessment categories used in other studies.

474

## 475 **Conclusion**

476 Based on this review, the food resources available in the Caatinga offer diversity and quality to  
477 address the challenges posed in the characteristics of the region and by current food systems. We suggest  
478 that scientific researchers focus their efforts on Fabaceae, especially tree legumes, which, due to their  
479 physiological, nutritional, and culinary qualities, simultaneously articulate human and environmental  
480 health, economic resilience, and sustainable agriculture. We advocate the recognition of these plants as  
481 strategic in building a research agenda on food biodiversity.

482 We highlight the need for researchers to collect information on culinary uses of species in  
483 ethnobotanical studies on food plants. In our analysis, half of the studies did not present this data. This  
484 information will make it possible for us to advance collectively in the discussion about antinutritional  
485 factors and toxicity associated with these plants. In this sense, we also emphasize the need for  
486 ethnoculinary studies with a focus on legumes.

487 The consumption of BFP is one of the pillars of sustainable diets. We hope that the data presented  
488 in this review can encourage the study of these plants. Thus, provided with evidence about their potential



489 and safety, we will be able to support the formulation of food and agriculture policies, as well as  
490 sustainable diet guidelines based on local plants.

491

## 492 **Acknowledgments**

493 To Luciana Medeiros Souto (LMS) for her collaboration in data collection. To Ivanilda Soares  
494 Feitosa for the support in checking occurrence data. To Samile Laura Dias Barros, Alice Medeiros Souza,  
495 Giovanna Guadalupe Cordeiro de Oliveira, André Luiz Dadona Benedito and Elias Jacob de Menezes  
496 Neto for having collaborated with the construction of the methodology. We also thank Thiago Perez Jorge,  
497 Adriana Monteiro de Almeida, Célia Marcia Medeiros Morais, Clélia de Oliveira Lyra, Severina Carla  
498 Vieira Cunha Lima, and Fernanda Antunes Carvalho for exchanging ideas in the construction of the  
499 umbrella project. To teacher Jonathan that reviewed our English and polished our writing.

500

## 501 **Funding**

502 This study was funded by the Universidade Federal do Rio Grande do Norte through a Scientific  
503 Initiation research scholarship to MFAM (UFRN call 01/2018), and by the Conselho Nacional de  
504 Desenvolvimento Científico e Tecnológico through a postdoctoral scholarship to MCMJ (150654/2019-  
505 7), and research productivity scholarship granted to UPA (302380/2011-6). Funders had no role in the  
506 study design, data collection and analysis, decision to publish or prepare the manuscript.

507

## 508 **References**

- 509 1. Swinburn BA, Kraak VI, Allender S, Atkins VJ, Baker PI, Bogard JR, et al. The Global  
510 Syndemic of Obesity, Undernutrition, and Climate Change: The Lancet Commission report.  
511 Lancet. 2019;393(10173):791–846.
- 512 2. International Panel of Experts on Sustainable Food Systems. Unravelling the Food–Health  
513 Nexus: Addressing practices, political economy, and power relations to build healthier food  
514 systems. Ipes-Food. Belgium; 2017.
- 515 3. United Nations. Transforming our world: the 2030 agenda for sustainable development. UN. New  
516 York; 2015. 1–35 p.
- 517 4. United Nations. Decade of Action on Nutrition. New York: UN; 2016.
- 518 5. United Nations. Transforming our world: the 2030 agenda for sustainable development. Vol.  
519 16301, General Assembly 70 session. 2015.
- 520 6. Food and Agriculture Organization of the United Nations. Guidelines on assessing biodiverse  
521 foods in dietary intake surveys [Internet]. 2017. 1–96 p. Available from: [http://www.fao.org/3/a-](http://www.fao.org/3/a-i6717e.pdf)  
522 [i6717e.pdf](http://www.fao.org/3/a-i6717e.pdf)
- 523 7. Jardim Botânico do Rio de Janeiro. Flora do Brasil 2020 em construção [Internet]. 2018 [cited  
524 2018 Oct 30]. Available from: <http://floradoBrazil.jbrj.gov.br/>
- 525 8. Instituto Brasileiro de Geografia e Estatística. Mapa de biomas do Brasil [Internet]. IBGE. 2004  
526 [cited 2020 Feb 26]. Available from:  
527 <https://ww2.ibge.gov.br/home/presidencia/noticias/21052004biomashtml.shtm>
- 528 9. Gubert MB, Perez-Escamilla R. Severe food insecurity in Brazilian municipalities, 2013. Cienc e  
529 Saude Coletiva. 2018;23(10):3433–44.

- 530 10. Lachat C, Raneri JE, Smith KW, Kolsteren P, Van Damme P, Verzelen K, et al. Dietary species  
531 richness as a measure of food biodiversity and nutritional quality of diets. *Proc Natl Acad Sci*  
532 [Internet]. 2018 Jan;115(1):127–32. Available from:  
533 <http://www.pnas.org/lookup/doi/10.1073/pnas.1709194115>
- 534 11. Cáceres MES, Lücking R, Rambold G. Biodiversity hotspots for conservation priorities.  
535 *Biodivers Conserv*. 2008;17(6):853–8.
- 536 12. Shackleton C, Shackleton S. The importance of non-timber forest products in rural livelihood  
537 security and as safety nets: A review of evidence from South Africa. *S Afr J Sci*. 2004;100(11–  
538 12):658–64.
- 539 13. Arimond M, Ruel MT. Dietary Diversity Is Associated with Child Nutritional Status: Evidence  
540 from 11 Demographic and Health Surveys. *J Nutr*. 2004;134(10):2579–85.
- 541 14. Termote C, Bwama Meyi M, Dhed’a Djailo B, Huybregts L, Lachat C, Kolsteren P, et al. A  
542 biodiverse rich environment does not contribute to a better diet: A case study from DR Congo.  
543 *PLoS One*. 2012;7(1):e30533.
- 544 15. Burlingame B, Charrondiere R, Mouille B. Food composition is fundamental to the cross-cutting  
545 initiative on biodiversity for food and nutrition. *J Food Compos Anal*. 2009;22(5):361–5.
- 546 16. Global Facilitation Unit for Underutilized Species. Progress Report. Edinburgh: University of  
547 Edinburgh; 2017.
- 548 17. Principais itens para relatar Revisões sistemáticas e Meta-análises: A recomendação PRISMA.  
549 *Epidemiol e Serviços Saúde* [Internet]. 2015;24(2):335–42. Available from:  
550 [http://www.iec.pa.gov.br/template\\_doi\\_ess.php?doi=10.5123/S1679-  
551 49742015000200017&scielo=S2237-96222015000200335](http://www.iec.pa.gov.br/template_doi_ess.php?doi=10.5123/S1679-49742015000200017&scielo=S2237-96222015000200335)

- 552 18. Bramer WM, Rethlefsen ML, Kleijnen J, Franco OH. Optimal database combinations for  
553 literature searches in systematic reviews: A prospective exploratory study. *Syst Rev.* 2017;6(1).
- 554 19. Nordic Committee on Food Analysis. Analytical Quality Control - Guidelines for the publication  
555 of analytical results of chemical analyses in foodstuffs. Vol. 2011. 2011.
- 556 20. Von Elm E, Altman DG, Egger M, Pocock SJ, Gøtzsche PC, Vandenbroucke JP. The  
557 strengthening the reporting of observational studies in epidemiology (STROBE) statement:  
558 Guidelines for reporting observational studies. *Int J Surg.* 2014;
- 559 21. Tong A, Sainsbury P, Craig J. Consolidated criteria for reporting qualitative research (COREQ):  
560 A 32-item checklist for interviews and focus groups. *Int J Qual Heal Care.* 2007;
- 561 22. Medeiros P, Ferreira W, Ramos M, Silva T, Ladio A, Albuquerque U. Why do people use exotic  
562 plants in their local medical systems? A systematic review based on Brazilian local communities.  
563 *PLoS One* [Internet]. 2017;12(9):1–10. Available from:  
564 <http://www.embase.com/search/results?subaction=viewrecord&from=export&id=L618483695%0>  
565 [Ahttp://dx.doi.org/10.1371/journal.pone.0185358](http://dx.doi.org/10.1371/journal.pone.0185358)
- 566 23. Instituto de Pesquisas Jardim Botânico do Rio de Janeiro. Re flora: Flora do Brasil 2020 - Algas,  
567 Fungos e Plantas [Internet]. 2020 [cited 2019 Dec 2]. Available from: <http://reflora.jbrj.gov.br/>
- 568 24. Carvalho AFU, Farias DF, da Rocha-Bezerra LCB, de Sousa NM, Cavalheiro MG, Fernandes  
569 GS, et al. Preliminary assessment of the nutritional composition of underexploited wild legumes  
570 from semi-arid Caatinga and moist forest environments of northeastern Brazil. *J Food Compos*  
571 *Anal.* 2011;24(4–5):487–93.

- 572 25. Cruz MP, Medeiros PM, Combariza IS, Peroni N, Albuquerque UP. “ I eat the manofê so it is not  
573 forgotten” : Local perceptions and consumption of native wild edible plants from seasonal dry  
574 forests in Brazil. *J Ethnobiol Ethnomed*. 2014;10(1).
- 575 26. Cruz MP, Peroni N, Albuquerque UP. Knowledge, use and management of native wild edible  
576 plants from a seasonal dry forest (NE, Brazil). *J Ethnobiol Ethnomed*. 2013;9(1).
- 577 27. Nascimento V, Lucena R, Maciel M, Albuquerque U. Knowledge and use of wild food plants in  
578 areas of dry seasonal forests in Brazil. *Ecol Food Nutr*. 2013;52(4):317–43.
- 579 28. Santos LL, Ramos MA, da Silva SI, de Sales MF, de Albuquerque UP. Caatinga Ethnobotany:  
580 Anthropogenic Landscape Modification and Useful Species in Brazil’s Semi-Arid Northeast.  
581 *Econ Bot*. 2009;63(4):363–74.
- 582 29. Santos LL, Nascimento AL, Vieira FJ, Silva VA, Voeks R, Albuquerque UP. The Cultural Value  
583 of Invasive Species: A Case Study from Semi-Arid Northeastern Brazil. *Econ Bot*.  
584 2014;68(3):283–300.
- 585 30. Feitosa Ferraz JS, Caraciolo Ferreira RL, dos Santos MV, Jacqueline Meunier IM. Uses of the  
586 woody species of the caatinga in Floresta, Pernambuco, Brazil: Indigenous knowledge in the  
587 Village Travessao do Ouro. *BOSQUE*. 2012;33(2):183–90.
- 588 31. Nunes EN, Guerra NM, Arévalo-Marín E, Alves CAB, do Nascimento VT, da Cruz DD, et al.  
589 Local botanical knowledge of native food plants in the semiarid region of Brazil. *J Ethnobiol*  
590 *Ethnomed*. 2018;14(1).
- 591 32. Roque ADA, Bezerra Loiola MI. Potential of Using Plant Resources in a Rural Community in the  
592 Semiarid in the Potiguar Semiarid. *Rev CAATINGA*. 2013;26(4):88–98.

- 593 33. Medeiros MF, Albuquerque UP. Food flora in 17th century northeast region of Brazil in *Historia*  
594 *Naturalis Brasiliae*. *J Ethnobiol Ethnomed*. 2014 Jun;10.
- 595 34. Almeida MLB, Freitas WEDS, Morais PLD De, Sarmiento JDA, Alves RE. Bioactive compounds  
596 and antioxidant potential fruit of *Ximenia americana* L. *Food Chem* [Internet]. 2016;192:1078–  
597 82. Available from: <http://dx.doi.org/10.1016/j.foodchem.2015.07.129>
- 598 35. Cavalcanti MT, Bora PS, Carvajal JCL. Propriedades funcionais das proteínas de amêndoas da  
599 faveleira (*Cnidoscopus phyllacanthus* (Mart.) Pax. et K. Hoffm.) com e sem espinhos. *Cienc e*  
600 *Tecnol Aliment*. 2009;
- 601 36. Nascimento VT, De Moura NP, Da Silva Vasconcelos MA, Maciel MIS, De Albuquerque UP.  
602 Chemical characterization of native wild plants of dry seasonal forests of the semi-arid region of  
603 northeastern Brazil. *Food Res Int*. 2011;44(7):2112–9.
- 604 37. Juvik OJ, Holmelid B, Francis GW, Andersen HL, de Oliveira AP, de Oliveira Junior RG, et al.  
605 Non-Polar Natural Products from *Bromelia laciniosa*, *Neoglaziovia variegata* and *Encholirium*  
606 *spectabile* (Bromeliaceae). *MOLECULES*. 2017;22(9).
- 607 38. Nascimento V, Vasconcelos M, Maciel M, Albuquerque U. Famine Foods of Brazil's Seasonal  
608 Dry Forests: Ethnobotanical and Nutritional Aspects. *Econ Bot*. 2012;66(1):22–34.
- 609 39. Food and Drug Administration. A Food Labeling Guide: Guidance for Industry [Internet].  
610 Washington, DC; 2013. Available from: <https://www.fda.gov/media/81606/download>
- 611 40. Nascimento VT, Moura NP, Silva Vasconcelos MA, Maciel MIS, Albuquerque UP. Chemical  
612 characterization of native wild plants of dry seasonal forests of the semi-arid region of  
613 northeastern Brazil. *Food Res Int*. 2011;44(7):2112–9.

- 614 41. Guinand Y, Lemessa D. Wild-food plants in Ethiopia: Reflections on the role of wild foods and  
615 famine foods at a time of drought. In: Kenyatta C, Henderson A, editors. The potential of  
616 indigenous wild foods [Internet]. USAID/OFDA, CRS/Southern Sudan; 2001. p. 31–46.  
617 Available from: [http://pdf.usaid.gov/pdf\\_docs/](http://pdf.usaid.gov/pdf_docs/)
- 618 42. Medeiros MJ, Oliveira DS, Oliveira MT, Willadino L, Houllou L, Santos MG. Ecophysiological,  
619 anatomical and biochemical aspects of in vitro culture of zygotic *Syagrus coronata* embryos and  
620 of young plants under drought stress. *Trees - Struct Funct.* 2015;29(4):1219–33.
- 621 43. Gomes FP, Prado CHBA. Ecophysiology of coconut palm under water stress. *Brazilian J Plant*  
622 *Physiol.* 2007;19(4):377–91.
- 623 44. Siddique K, Walton G, Seymour M. A comparison of seed yields of winter grain legumes in  
624 Western Australia. *Aust J Exp Agric.* 1993;33(7):915–22.
- 625 45. Junior D, Batista JC, Muir JP, Apolinário VX de O, Nair PK, Lira M de A, et al. Tree legumes:  
626 an underexploited resource in warm-climate silvopastures. *Rev Bras Zootec.* 2017;46(8):689–703.
- 627 46. Shelef O, Weisberg PJ, Provenza FD. The value of native plants and local production in an era of  
628 global agriculture. *Front Plant Sci.* 2017;8.
- 629 47. Burlingame B. Sustainable Diets and biodiversity. Food and Agriculture Organization. Rome:  
630 FAO; 2012.
- 631 48. United Nations Educational Scientific and Cultural Organization. Convention for the  
632 safeguarding of the intangible cultural heritage. Unesco. Paris; 2003.
- 633 49. A.Weiler A, Hergesheimer C, Brisbois B, Wittman H, Yassi A, Spiegel JM. Food sovereignty,  
634 food security and health equity: a meta-narrative mapping exercise. *Health Policy Plan* [Internet].  
635 2015;30(8):1078.

- 636 50. Alencar NL, de Sousa Araújo TA, de Amorim ELC, de Albuquerque UP. The inclusion and  
637 selection of medicinal plants in traditional pharmacopoeias-evidence in support of the  
638 diversification hypothesis. *Econ Bot.* 2010;64(1):68–79.
- 639 51. Liener I. Implications of antinutritional components in soybean foods. *CRC Crit Rev Food Sci*  
640 *Nutr.* 1994;34(1):31–67.
- 641 52. Gilani GS, Cockell KA, Sepehr E. Effects of antinutritional factors on protein digestibility and  
642 amino acid availability in foods. *J AOAC Int.* 2005;88(3):967–87.
- 643 53. Grant G, McKenzie N, Moreira R, Pusztai A. *Dioclea grandiflora* and *Dioclea sclerocarpa* seeds.  
644 A nutritional study. *Qual Plant Plant Foods Hum Nutr.* 1986;36:47–61.
- 645 54. Jones DA. Why are so many food plants cyanogenic? *Phytochemistry.* 1998;47(2):155–62.
- 646 55. Folashade I, Olanrewaju M, Adebisi S, Stephen A. A Review of Cyanogenic Glycosides in  
647 Edible Plants. *Toxicol - New Asp to This Sci Conundrum.* 2016;180–91.
- 648 56. Ferreira-Júnior, W; Campos, L; Pieroni, A; Albuquerque U. Bases biológicas e culturais para o  
649 uso de Plantas Alimentícias e Medicinais. In: Albuquerque U, editor. *Etnobiologia: bases*  
650 *ecológicas e evolutivas.* 2nd ed. Recife: NUPEEA; 2018.
- 651 57. Berrazaga I, Micard V, Gueugneau M, Walrand S. The role of the anabolic properties of plant-  
652 versus animal-based protein sources in supporting muscle mass maintenance: a critical review.  
653 *Nutrients.* 2019;11(8).
- 654 58. Lynch H, Johnston C, Wharton C. Plant-based diets: Considerations for environmental impact,  
655 protein quality, and exercise performance. *Nutrients.* 2018;10(12).



- 656 59. Thomas DT, Erdman KA, Burke LM. Position of the Academy of Nutrition and Dietetics,  
657 Dietitians of Canada, and the American College of Sports Medicine: Nutrition and Athletic  
658 Performance. *J Acad Nutr Diet*. 2016;116(3):501–28.
- 659 60. Melina V, Craig W, Levin S. Position of the Academy of Nutrition and Dietetics: Vegetarian  
660 Diets. *J Acad Nutr Diet*. 2016;116(12):1970–80.
- 661 61. Food and Agriculture Organization. The International Year of Pulses. Rome: FAO; 2016.
- 662 62. Cowan RS. Tropical Legumes: Resources for the Future. Vol. 29, *Taxon*. 1980; 2:180.
- 663 63. Shepon A, Eshel G, Noor E, Milo R. The opportunity cost of animal based diets exceeds all food  
664 losses. *Proc Natl Acad Sci [Internet]*. 2018;201713820. Available from:  
665 <http://www.pnas.org/lookup/doi/10.1073/pnas.1713820115>
- 666 64. Silva RB, Silva-Júnior E V., Rodrigues LC, Andrade LHC, Da Silva SI, Harand W, et al. A  
667 comparative study of nutritional composition and potential use of some underutilized tropical  
668 fruits of Arecaceae. *An Acad Bras Cienc*. 2015;87(3):1701–9.
- 669 65. Institute of Medicine. Dietary Reference Intakes for Vitamin A, Vitamin K, Arsenic, Boron,  
670 Chromium, Copper, Iodine, Iron, Manganese, Molybdenum, Nickel, Silicon, Vanadium, and  
671 Zinc. Dietary Reference Intakes for Vitamin A, Vitamin K, Arsenic, Boron, Chromium, Copper,  
672 Iodine, Iron, Manganese, Molybdenum, Nickel, Silicon, Vanadium, and Zinc. Washington, DC;  
673 2002.
- 674 66. Rodrigues-Amaya DB. Tabela Brasileira de Composição de Carotenóides em Alimentos. Vol. 52,  
675 Ministério do Meio Ambiente – MMA. 2008.
- 676 67. Huber LS, Rodriguez-amaya DB. Flavonóis E Flavonas : Fontes Brasileiras E Fatores Que  
677 Influenciam a Composição Em. *Aliment Nutr*. 2008;19(1):97–108.

- 678 68. Lima A de JB, Corrêa AD, Saczk AA, Martins MP, Castilho RO. Anthocyanins, pigment stability  
679 and antioxidant activity in jaboticaba [*Myrciaria cauliflora* (Mart.) O. Berg]. Rev Bras Frutic.  
680 2011;33(3):877–87.
- 681 69. Novaes RLM, Felix S, Souza RDF. Save Caatinga from drought disaster. Nature.  
682 2013;498(7453):170.
- 683 70. International Panel of Experts on Sustainable Food Systems. From Uniformity to Diversity: A  
684 paradigm shift from industrial agriculture to diversified agroecological systems. Belgium: IPES-  
685 Food; 2015.
- 686 71. Reyes-García V, Vadez V, Huanca T, Leonard W, Wilkie D. Knowledge and Consumption of  
687 Wild Plants: A comparative study in two Tsimane’ villages in the Bolivian Amazon. Ethnobot  
688 Res Appl. 2005;3:201.
- 689 72. García GSC. The mother - child nexus. Knowledge and valuation of wild food plants in  
690 Wayanad, Western Ghats, India. J Ethnobiol Ethnomed. 2006;2(1):39.
- 691 73. Rapoport E, Ladio A, Rafffaele E, Ghermandi L, Sanz E. Malezas Comestibles. Hay yuyos y  
692 yuyos... Cienc Hoy [Internet]. 1998;9(49).
- 693 74. De Bem Lignani J, Sichieri R, Burlandy L, Salles-Costa R. Changes in food consumption among  
694 the Programa Bolsa Família participant families in Brazil. Public Health Nutr. 2010;14(5):785–  
695 92.
- 696 75. Lévi-Strauss C. A origem dos modos à mesa. São Paulo: Cosac & Naify; 2006.
- 697 76. Durst, Patrick Bayasgalanbat N. Promotion of underutilized indigenous food resources for food  
698 security and nutrition in Asia and the Pacific. Rome; 2014.

699 77. Stadlmayr B, Wijesinha-Bettoni R, Haytowitz D, Rittenschober D, Cunningham J, Sobolewski R,  
700 et al. FAO / INFOODS. Guidelines for food matching. Version 1.2. FAO. Rome; 2012.

701

## 702 **Supporting information**

703 **S1** Prisma checklist

704 **S2** Research strategy for systematic review



bioRxiv preprint doi: <https://doi.org/10.1101/2020.03.13.990358>; this version posted March 13, 2020. The copyright holder for this preprint (which was not certified by peer review) is the author/funder, who has granted bioRxiv a license to display the preprint in perpetuity. It is made available under aCC-BY 4.0 International license.

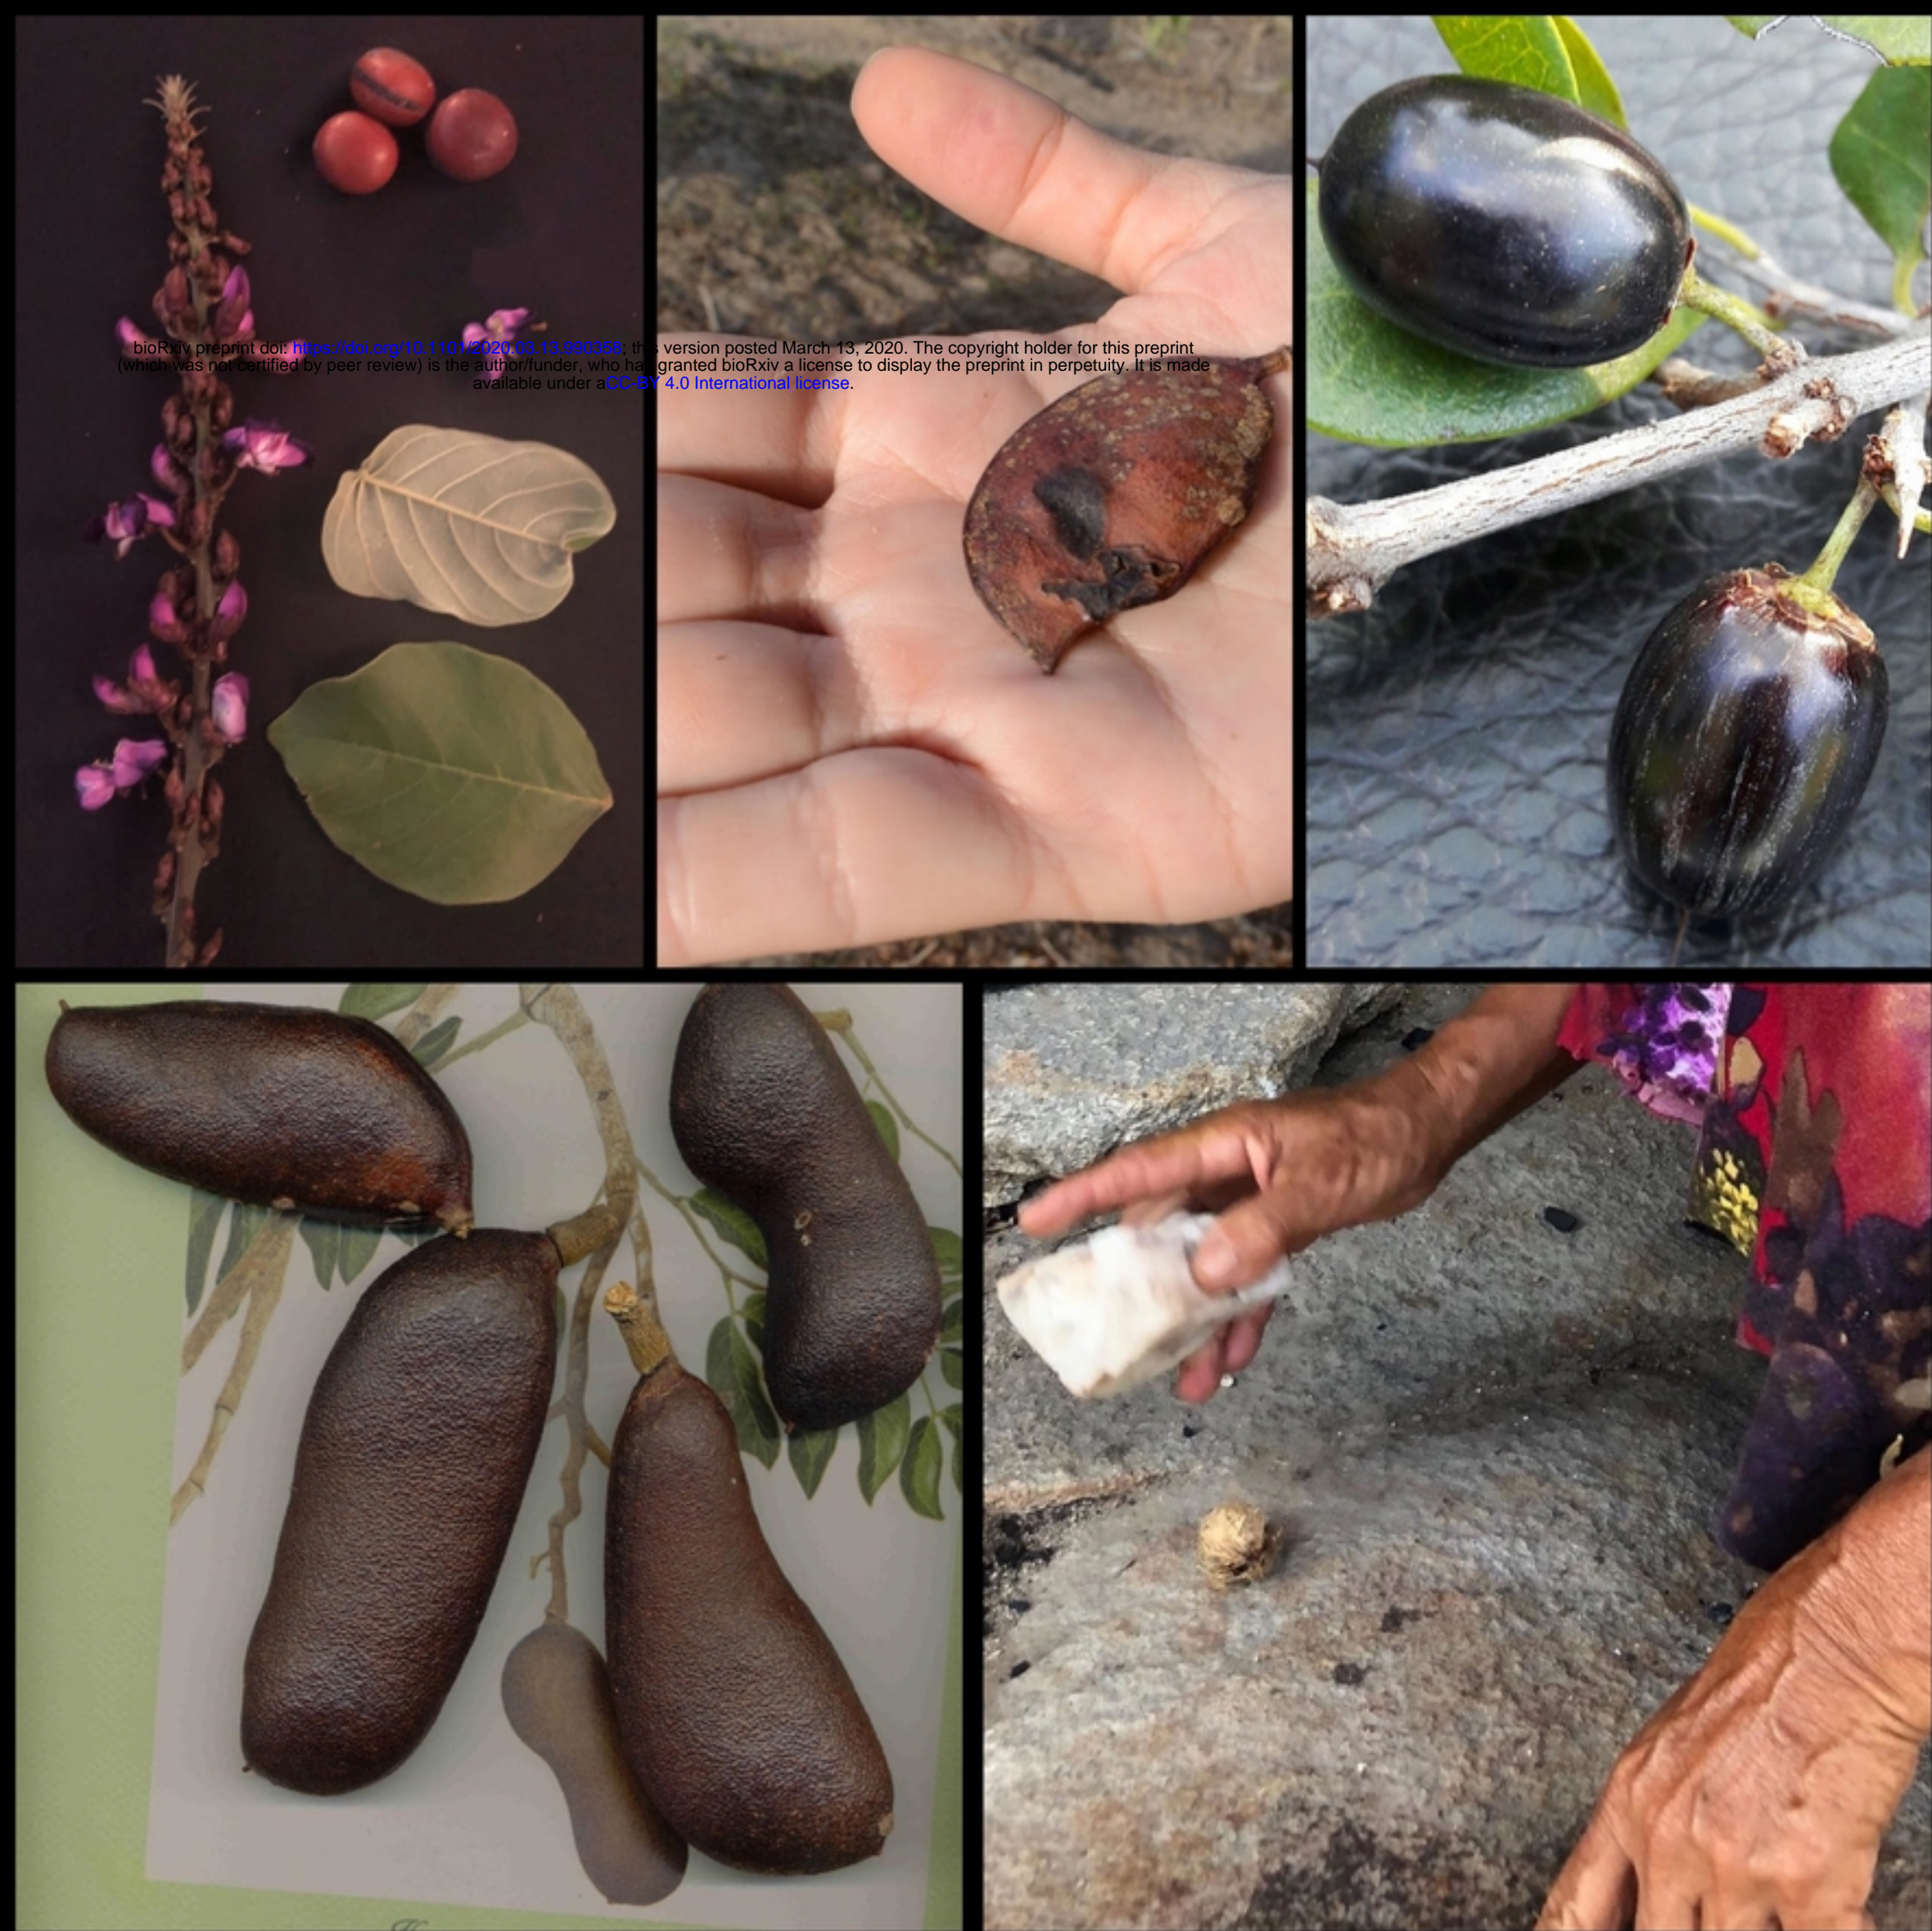

Fig. 3 Top five food plants of strategic species ranking



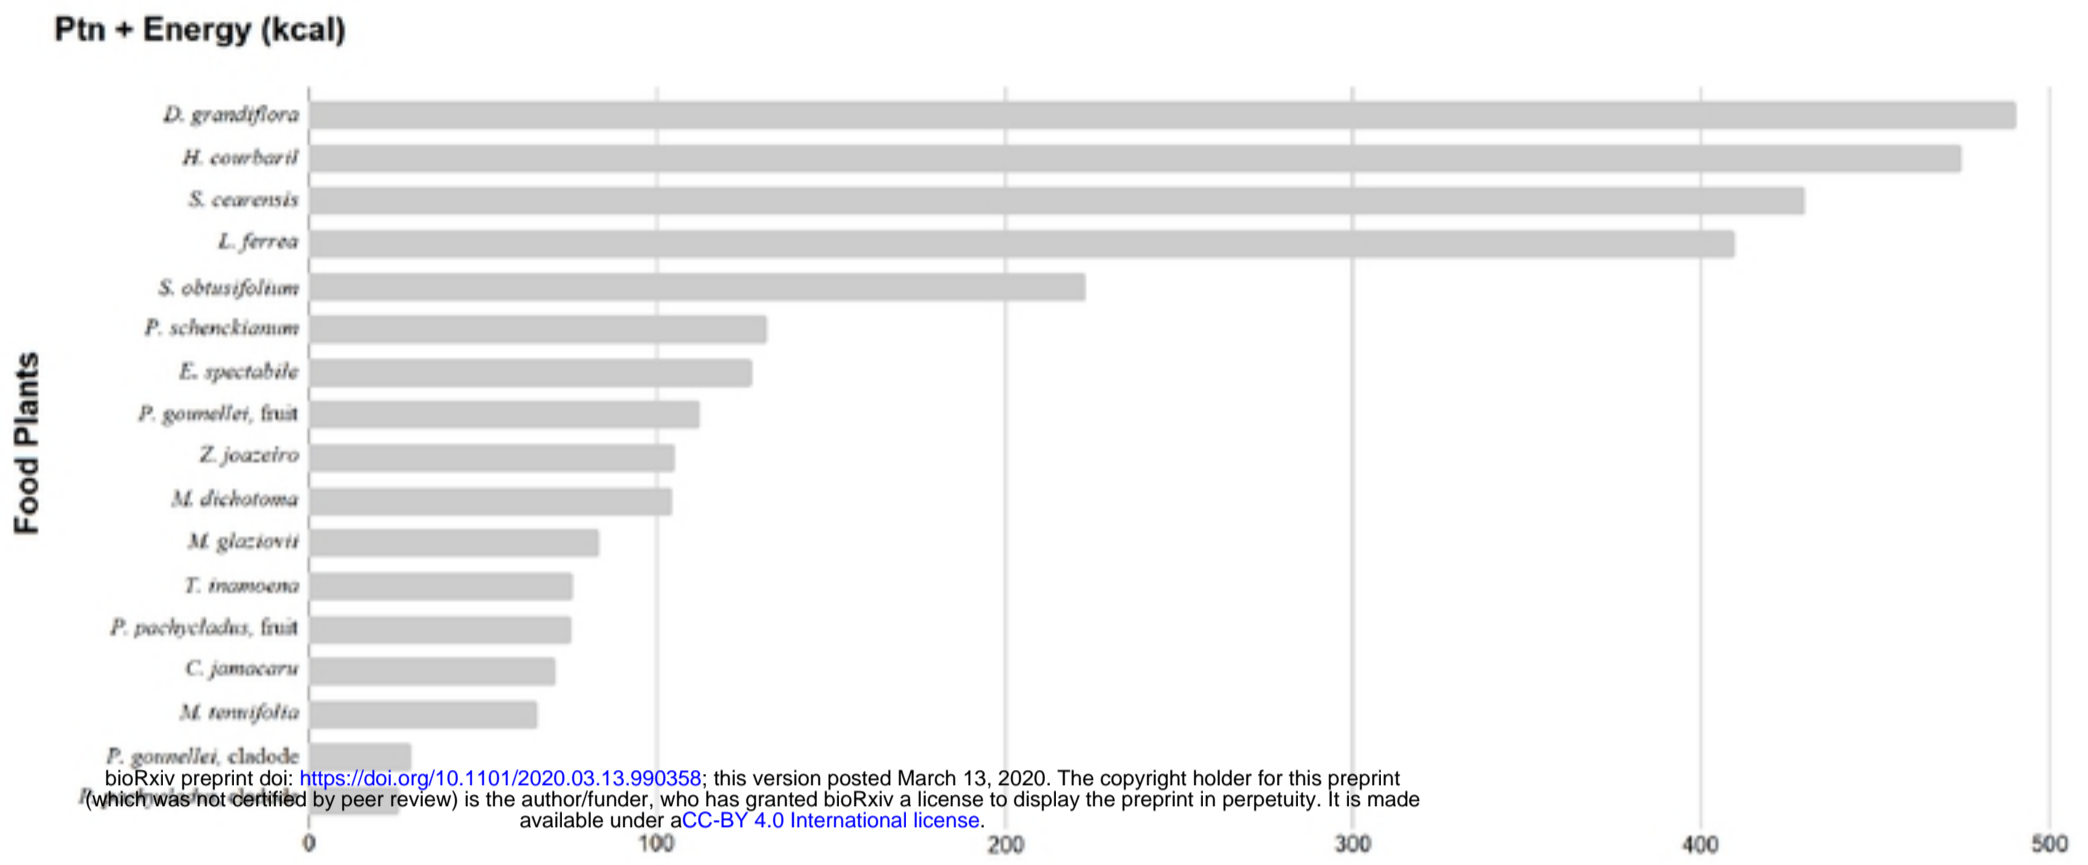

Fig. 2 Strategic biodiverse food plants to promote food and nutri

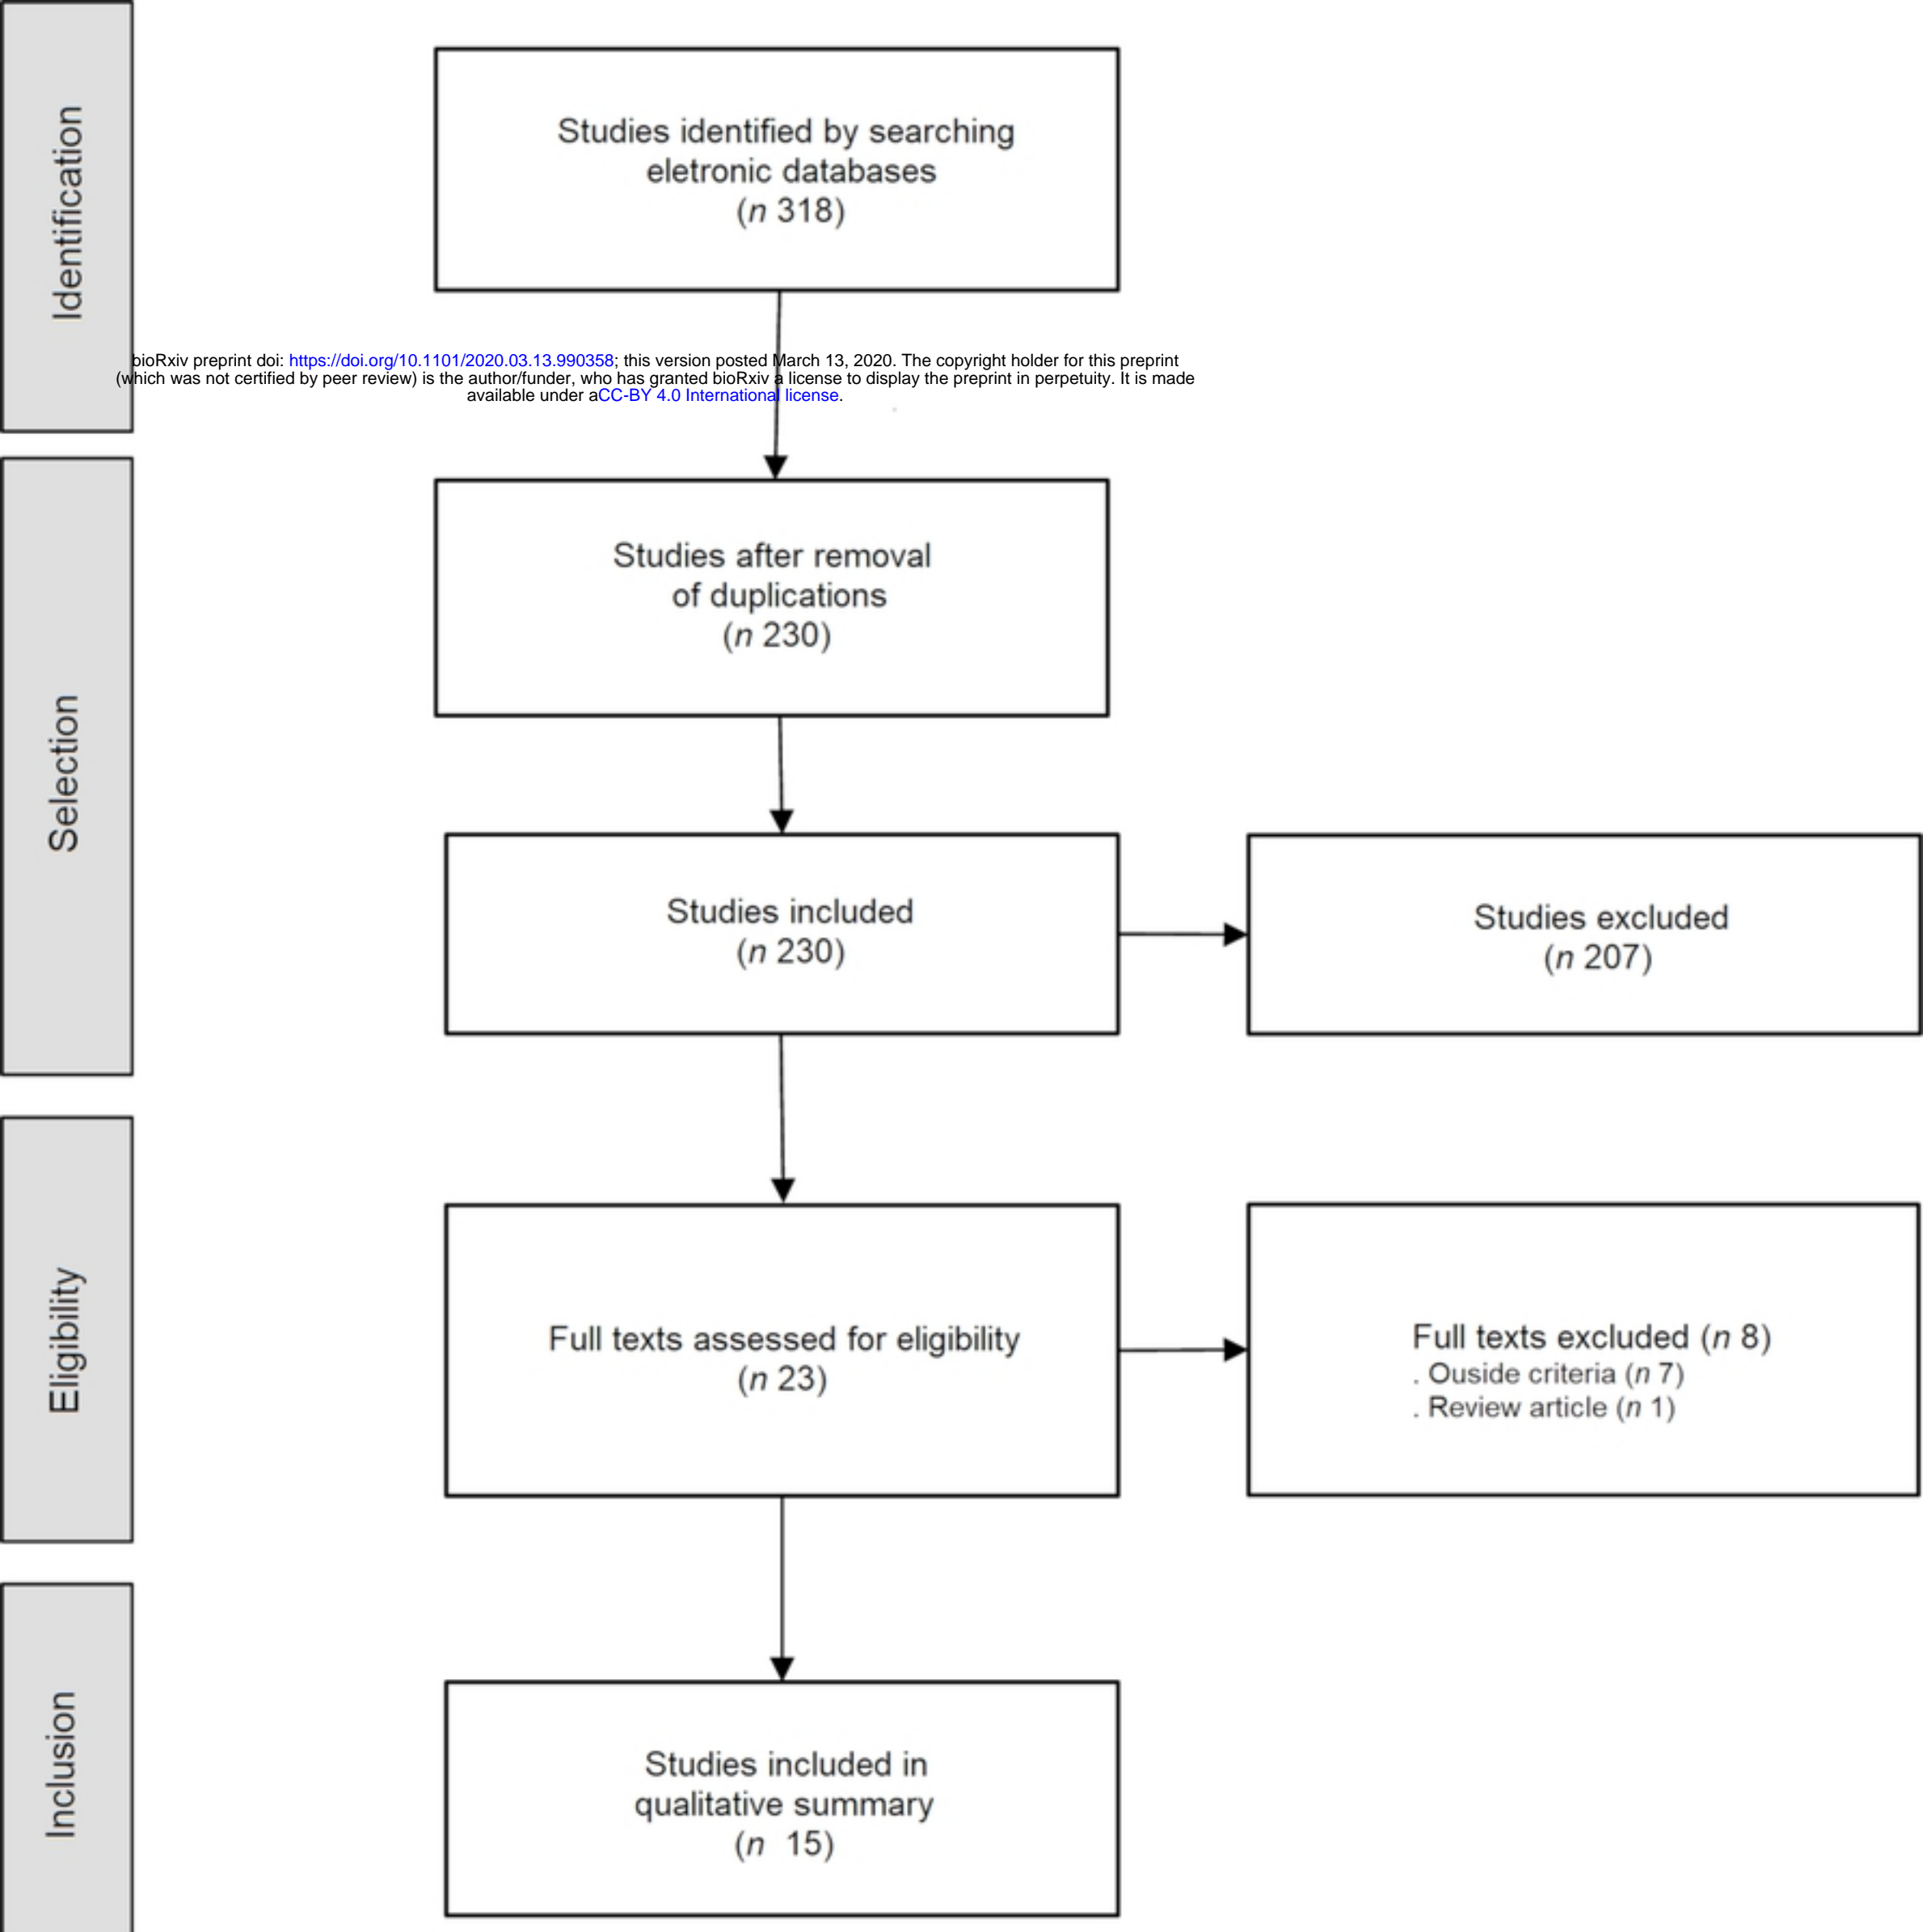

Fig. 1 Flowchart of the study selection process
